# Supplementary material for: High-quality genome assembly and pan-genome studies facilitate genetic discovery in mung bean and its improvement
Source: PubMed Central journal article supplement — Plant Commun. 2022 Jun 26;3(6):100352. doi: 10.1016/j.xplc.2022.100352 (PMC9700124; doi:10.1016/j.xplc.2022.100352), 2022-06-26
Supplement: mmc1.pdf [file mmc1.pdf]

**Plant Communications, Volume 3**

**Supplemental information**

**High-quality genome assembly and pan-genome studies facilitate genetic discovery in mung bean and its improvement**

**Changyou Liu, Yan Wang, Jianxiang Peng, Baojie Fan, Dongxu Xu, Jing Wu, Zhimin Cao, Yunqing Gao, Xueqing Wang, Shutong Li, Qiuzhu Su, Zhixiao Zhang, Shen Wang, Xingbo Wu, Qibing Shang, Huiying Shi, Yingchao Shen, Bingbing Wang, and Jing Tian**

1 **Supplemental Information for**

2 **Title: High-quality genome assembly and pan-genome studies facilitate genetic**  
3 **discovery in mungbean and its improvement**

4 Changyou Liu<sup>1#</sup>, Yan Wang<sup>1#</sup>, Jianxiang Peng<sup>2#</sup>, Baojie Fan<sup>1</sup>, Dongxu Xu<sup>3</sup>, Jing Wu<sup>4</sup>,  
5 Zhimin Cao<sup>1</sup>, Yunqing Gao<sup>3</sup>, Xueqing Wang<sup>1</sup>, Shutong Li<sup>3</sup>, Qiuzhu Su<sup>1</sup>, Zhixiao  
6 Zhang<sup>1</sup>, Shen Wang<sup>1</sup>, Xingbo Wu<sup>5</sup>, Qibing Shang<sup>3</sup>, Huiying Shi<sup>1</sup>, Yingchao Shen<sup>1</sup>,  
7 Bingbing Wang<sup>2\*</sup>, Jing Tian<sup>1\*</sup>

8

9 <sup>1</sup>Institute of Cereal and Oil Crops, Hebei Academy of Agricultural and Forestry  
10 Sciences/Hebei Laboratory of Crop Genetic and Breeding, Shijiazhuang 050035,  
11 China

12 <sup>2</sup>Biobin Data Sciences Co., Ltd, Changsha 410221, China

13 <sup>3</sup>Zhangjiakou Academy of Agricultural Sciences, Zhangjiakou 075300, China

14 <sup>4</sup>Institute of Crop Science, Chinese Academy of Agricultural Sciences, Beijing  
15 100081, China

16 <sup>5</sup>Tropical Research and Education Center, Department of Environmental Horticulture,  
17 University of Florida. 18905 SW 280th St, Homestead, FL 33031, USA

18 # These authors contributed equally.

19 \*Corresponding authors: Bingbing Wang: [bwang@biobin.com.cn](mailto:bwang@biobin.com.cn); Jing Tian:  
20 [nkytianjing@163.com](mailto:nkytianjing@163.com)

21

## 22 **Supplemental Text**

### 23 **Genome assembly quality assessment**

24 To assess the quality of the genome assembly, three different methods were used.  
25 First, Illumina PE reads were mapped to the assembled genome. The mapping rate for  
26 127.85-fold Illumina reads was 99.66%, 98.73% were properly paired, and only  
27 0.05% of the reads were singletons. The sequence mapping coverage was normally  
28 distributed, without heterozygosity and repeated peaks (Figure S3). The assembled  
29 sequence covered the whole genome, and there was no heterozygous region  
30 assembled into two haplotypes or the repeated region collapsed into one sequence.  
31 Second, by using BUSCO analysis, we estimated the genome completeness to be  
32 98.02% (Table 1; Figure S4). Finally, the LAI, which exploited the completeness of  
33 the assembled LTR as an indicator of the quality of the whole genome assembly, was  
34 utilized. The LAI score of the assembly was 15.67 (Table 1), which was of reference  
35 genome level according to developer classification standards (Ou *et al.*, 2018b).

### 36 **Duplications contributing to the expanded gene family**

37 Many expanded genes resulted from tandem duplication. For instance, among the  
38 41 genes annotated as an expanded family enriched in the isoflavonoid synthesis  
39 pathway, 35 (85%) were clustered into seven clusters (Data S3). Among them, six  
40 genes encoding isoflavone methyltransferase were clustered within a 50 kb region on  
41 Chr. 4 (51,555,368-51,607,654), of whose gene structure was similar. Three of these  
42 genes were expressed in flowers according to the RNA-seq data (Figure S7).  
43 Moreover, there were 12 genes annotated as isoflavonoid malonyl transferase or  
44 phenolic glucoside malonyl transferase clustered in an 80 kb region immediately  
45 downstream of the previous methyltransferase cluster. These examples indicated that  
46 tandem duplication played an important role in gene family expansion in mungbean.

47 Genome duplication can also lead to gene family expansion. As shown in Figure 1A,  
48 two large blocks on pseudomolecules Chr. 7 and Chr. 11, corresponding to  
49 approximately 5.2 Mb and 3.4 Mb, respectively, showed good collinearity. There is  
50 another example involved the two blocks of 4.3 Mb and 3.2 Mb between Chr. 2 and  
51 Chr. 3. There were a total of 39 synteny blocks over 1 Mb in size, containing  
52 thousands of duplicated genes.

### 53 **Divergence of Legumes**

54 Phylogenetic analysis revealed that the Phaseoleae and other species in the  
55 Papilionoideae family diverged ~50.51 million years ago (Mya). Three species from  
56 the genera *Vigna*, namely, mungbean (*Vigna radiata*), adzuki bean (*Vigna angularis*),  
57 and cowpea (*Vigna unguiculata*), were closely related. The divergence of mungbean  
58 from adzuki bean, cowpea, and soybean occurred ~5.7 Mya, ~7.5 Mya, and ~20.2 Mya,  
59 respectively (Figure S5), the findings of which were similar to those a previous study  
60 on the divergence time between mungbean and soybean (Kang *et al.*, 2014; Lavin *et al.*,  
61 2005) but different from the previously estimated divergence time (~8 Mya) between  
62 mungbean and adzuki bean (Kang *et al.*, 2015).

### 63 **Distribution of mungbean SNPs**

64 A total of 9.89 billion PE clean reads and 1.48 Tb of sequence data were  
65 generated by sequencing 217 mungbean accessions. When mapping the sequence  
66 reads to the Vrad\_JL7 genome, we found that 99.11% of reads from each accession  
67 could be mapped to and covered 93.36% of the Vrad\_JL7 genome on average (Table  
68 S4). A total of 2,229,343 high-quality SNPs were identified among these accessions,  
69 13.85% of which were distributed in the gene region rather than the intergenic region.  
70 For SNPs located in the gene regions, most were located in introns (~11.25% of the  
71 total proportion of SNPs), and only a small portion were present in the exons of the  
72 protein-coding region (~2.60%). We annotated 61,507 nonsynonymous SNPs, 49,828

73 synonymous SNPs, and 2,603 SNPs that cause stop or start codon changes. The  
74 distribution of SNPs on each chromosome of the genome is correlated with  
75 chromosome length and gene density. Chr. 11 (95,596) and Chr. 3 (101,950) had the  
76 fewest, and Chr. 7 (291,312), Chr. 4 (264,479) and Chr. 6 (261,463) had the most  
77 (Table S5).

## 78 **Gene numbers of different accessions in the mungbean pan-genome**

79 The gene numbers of the three categories were significantly different from each  
80 other, with CBLs having the most genes (40,971), CLRs having the second most  
81 (40,862) and NCLs having the fewest (40,787). The trend seemed opposite to the  
82 trend in the tomato pan genome (Gao *et al.*, 2019). Two wild accessions (TC1966 and  
83 ACC41) of NCLs from Madagascar and Australia were outliers, with only 39,573 and  
84 38,862 genes, respectively. Their morphologies were also quite distinct from those of  
85 other accessions. Twenty-eight genes unique to the two wild accessions were  
86 identified, including those encoding a LRR receptor-like serine threonine-protein  
87 kinase (Pang23039), chalcone-flavanone isomerase (Pang46397), and  
88 galacturonosyltransferase (Pang24618), indicating that wild mungbean accessions are  
89 good sources for improving important traits, such as disease resistance and flavanone  
90 content.

## 91 **Distribution of STAs in the mungbean genome**

92 As shown in Figure 5, the distribution of the STAs identified in this study was not  
93 even; Chr. 4 had the most STAs (1,431 STAs from 24 traits), and Chr. 9 had the  
94 fewest, and only 24 STAs were found from five traits. A total of 1,894 STAs were in  
95 intergenic regions, 299 in the 5' UTR or 3' UTR of the genes, and 1,224 in at least  
96 one gene region (exonic, intronic, start codon, intron splice sequences). A total of 248  
97 genes (270 transcripts) contained STAs (Data S6). For different types of traits, a total  
98 of 1,384 STAs were identified for seven yield-related traits, of which 596 were in the

99 gene region, causing 89 nonsynonymous mutations in transcripts. The numbers of  
100 total STAs and genic and nonsynonymous STAs for eight plant architecture-related  
101 traits were 655, 232, and 95, respectively; for seven colour-related traits, there were  
102 433, 139, and 58, respectively; for four quality-related traits, there were 274, 101, and  
103 47, respectively; for two biotic stress resistance traits, there were 610, 190, and 45,  
104 respectively; and for three other important agronomic traits, there were 131, 56, and  
105 19, respectively.

### 106 **Candidate genes associated with yield-related traits**

107 Among all traits, BRN had the most STAs (1,026) identified, 947 of which were  
108 located on Chr. 4: 12-13 Mb. The same region was identified in multiple  
109 environments and by multiple methods (SNP-based and gene PAV-based) (Figure  
110 S16). Thirteen STAs and five GPTAs were consistent across different environments,  
111 thus narrowing the region to 180 kb, with GPTAs in the middle surrounded by STAs  
112 (Figure S17). Twenty-three genes with possible functions in disease resistance, sugar  
113 metabolism, DNA repair, etc., were found in this region, five of which (jg4298,  
114 jg4300-jg4303) revealed PAV events. The functions of the five genes were disease  
115 resistance related, hexokinase or unknown. The presence/absence of these five genes  
116 in different mungbean accessions was strongly associated with BRN, indicating that  
117 one of them could regulate BRN in mungbean (Figure S18). On Chr. 10, seven STAs  
118 were mapped to the coding region of gene jg30665, a homologue of transcription  
119 factor TCP2, which was found to play important roles in regulating the  
120 morphogenesis of shoot organs and ovule development in *Arabidopsis* (Wei *et al.*,  
121 2015).

122 For other yield-related traits, 197 STAs and 16 GPTAs were identified for PDL,  
123 PDW or SD100WT, 30 of them (23 STAs and 7 GPTAs) were the same for at least 2  
124 traits, and 7 STAs were the same for all three yield traits. One STA associated with  
125 PDL (7\_27965615\_A\_C) was located at the promoter region of jg22573, which was

126 annotated as a NRT1/PTR FAMILY 2.13 like protein. The average PDL of accessions  
127 with the CC allele at this site was significantly shorter than that of accessions with the  
128 AA allele (Figure S19). The Arabidopsis homologue AT1G69870 was expressed  
129 mainly in the pods, siliques and petals, indicating that this gene is a good candidate  
130 for pod development in mungbean. For YPPL, several consistent STAs were  
131 identified on region Chr. 4 (29,263,225-29,697,203) containing 31 candidate genes,  
132 which seemed to belong to a single LD block. Among them, jg5489 was annotated as  
133 the WUSCHEL-related homeobox 3 gene. The rice homologue gene (WOX3) is  
134 related to growth and development (Dai *et al.*, 2007), and the Norway spruce  
135 homologue gene (PaWOX3) regulates lateral organs (Alvarez *et al.*, 2015).  
136

137 **Supplemental Figures**

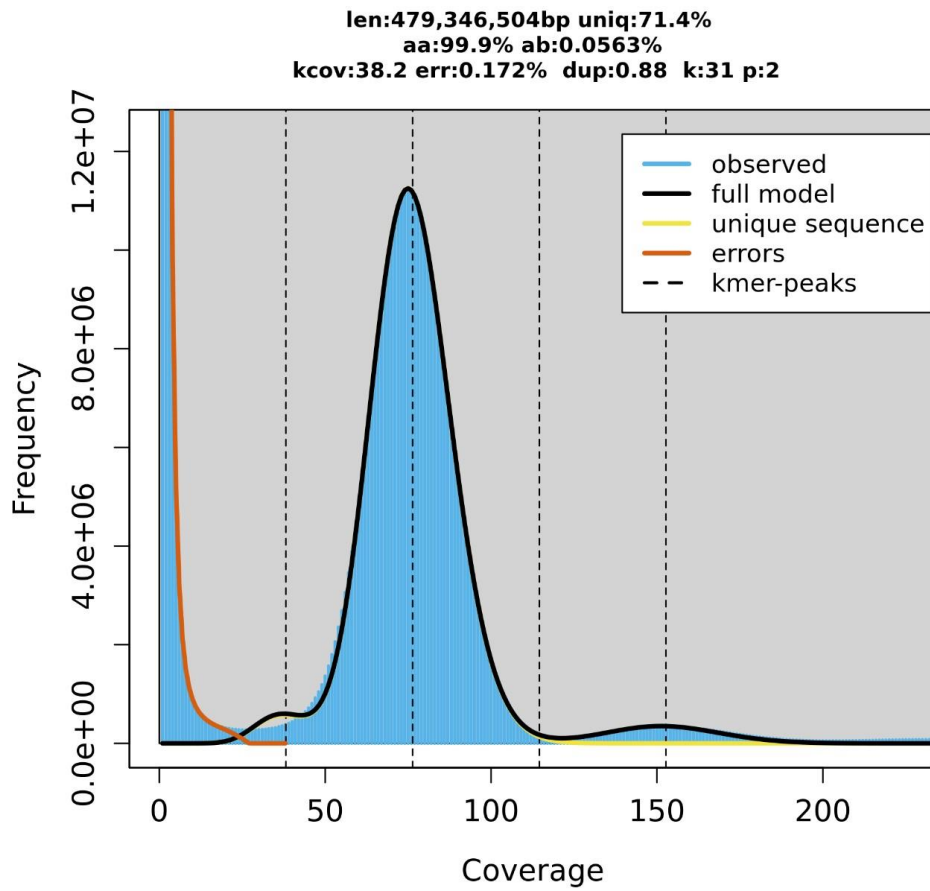

138

139 **Figure S1.** Genome survey of mungbean Jilv7. The k-mer frequencies were generated  
140 from raw read data to estimate the genome size, abundance of repetitive elements and  
141 rate of heterozygosity via GenomeScope (v2.0) (Vurture *et al.*, 2017).

142



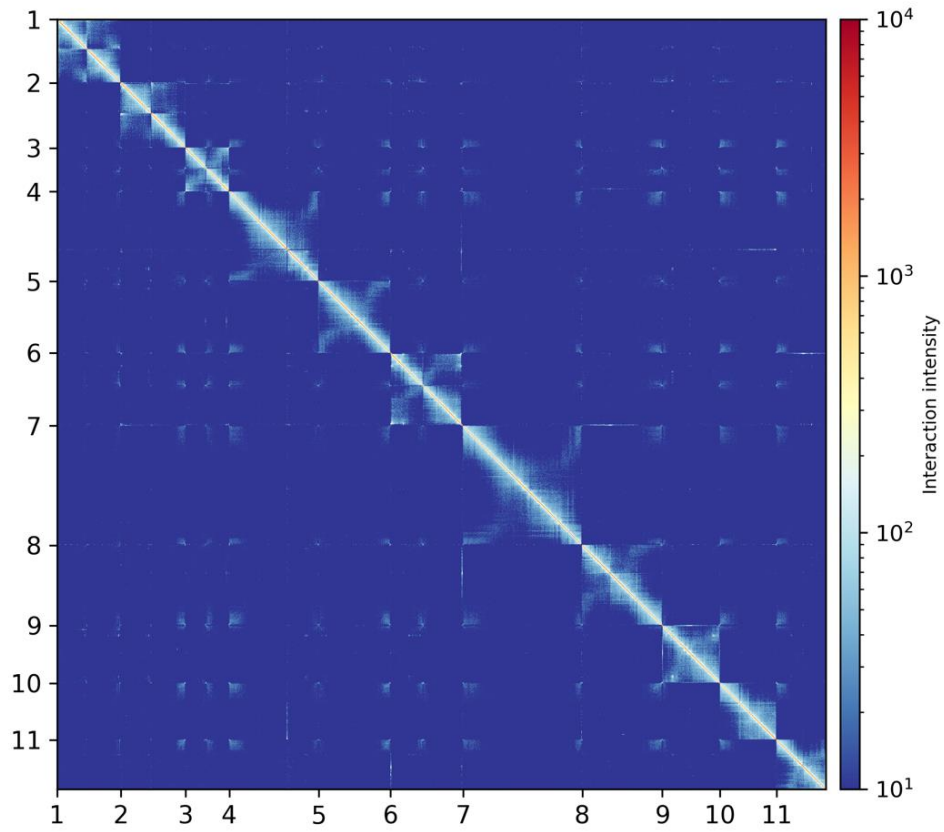

144 **Figure S2.** Hi-C heatmap of chromosome interactions.

145

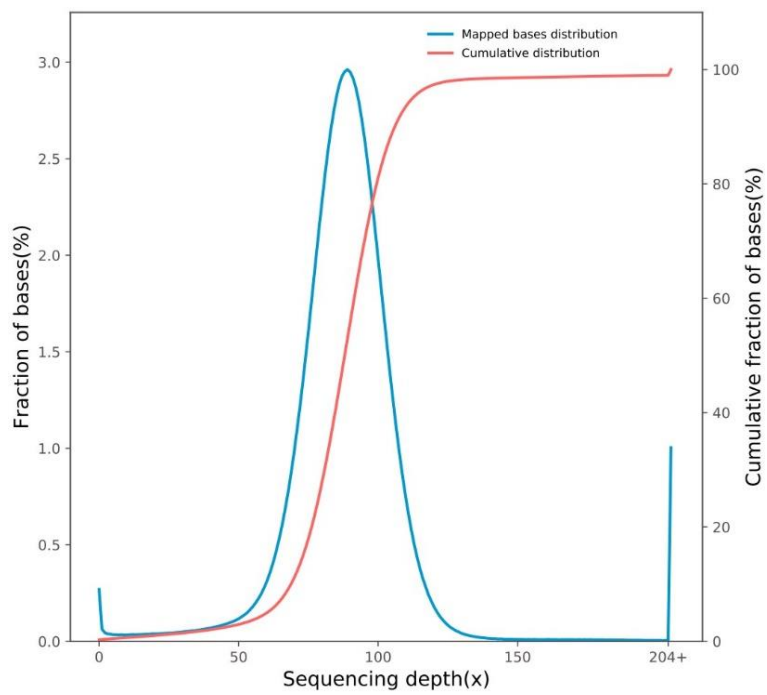

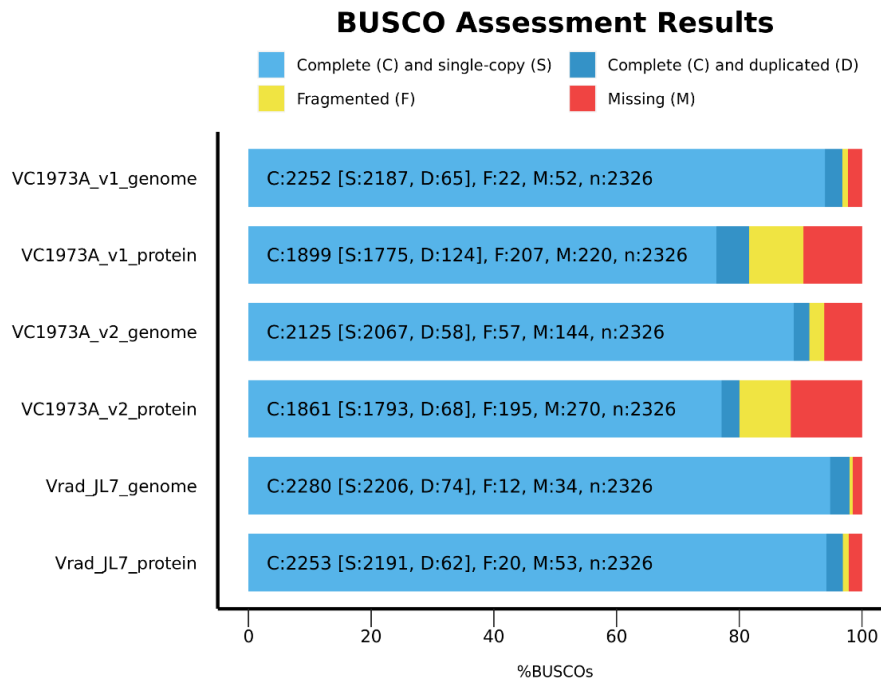

149

150 **Figure S4.** BUSCO comparison of the genome and protein sequence data of  
 151 Vrad\_JL7, VC1973A version 1 (VC1973A\_v1), and VC1973A version 2  
 152 (VC1973A\_v2).

153

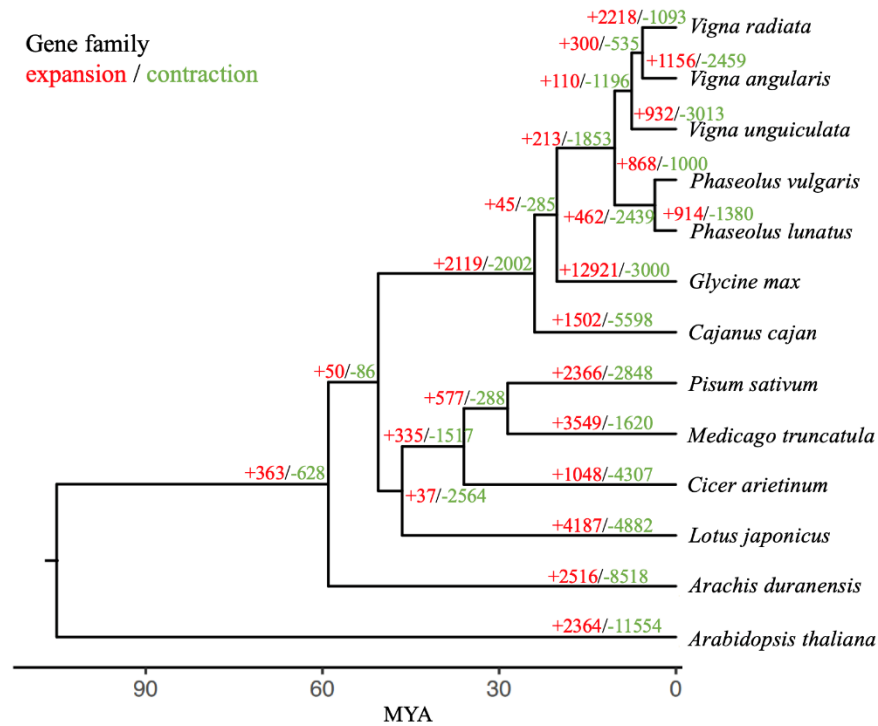

154

155 **Figure S5.** Phylogenetic tree comprised mungbean and 12 other species. The number  
 156 on each branch indicates the number of genes within the expanded (red)/contracted  
 157 (green) gene families in each plant species.

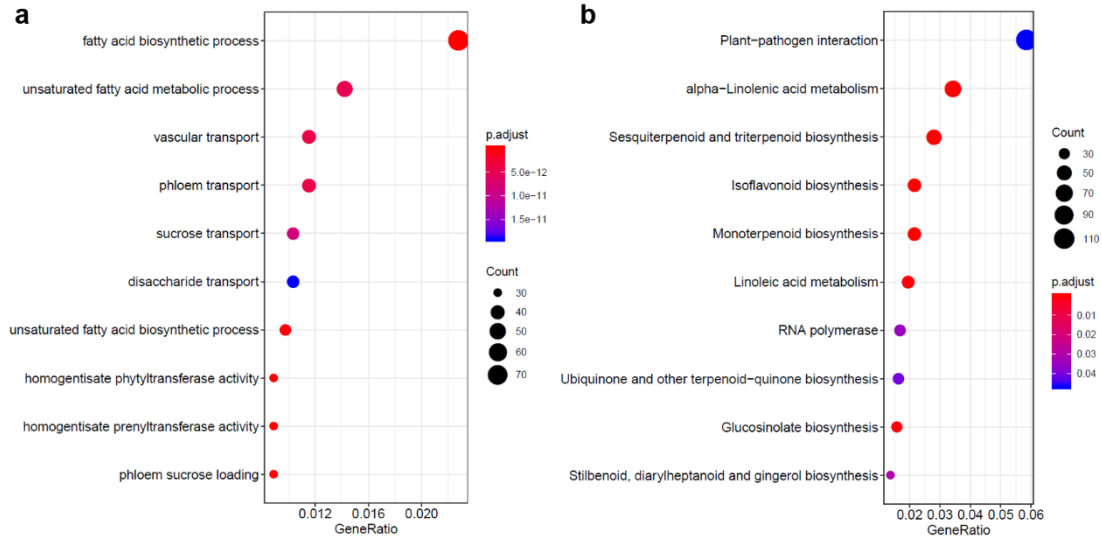

158  
 159 **Figure S6.** GO (a) and KEGG pathway (b) enrichment of expanded gene families in  
 160 mungbean.

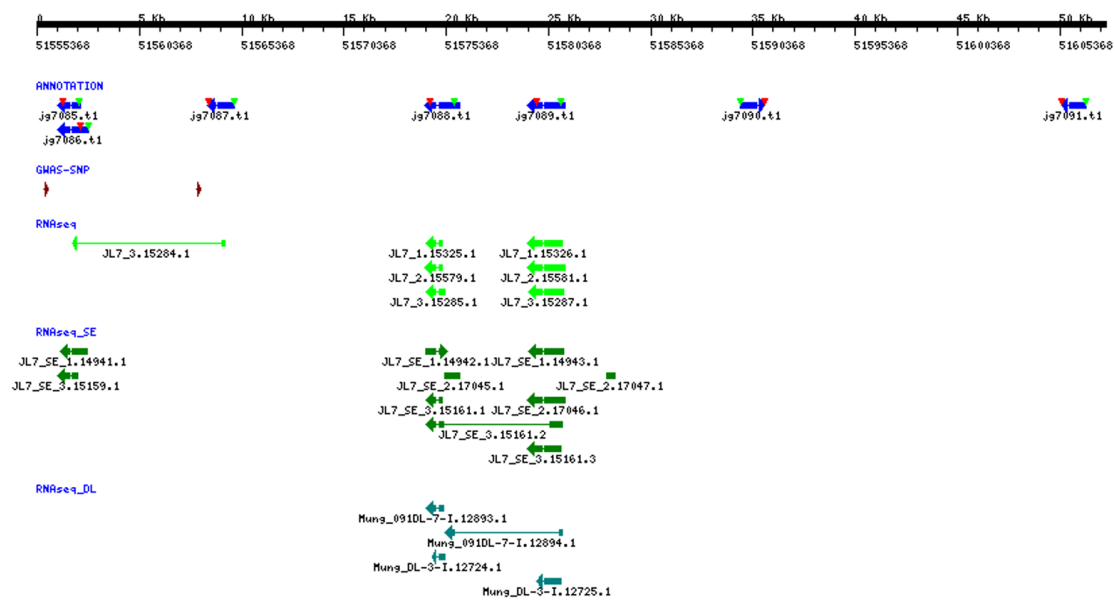

161  
 162 **Figure S7.** Gene structure of the 50 kb region of Chr. 4 (51,555,368-51,607,654) in  
 163 Vrad\_JL7 and its supporting transcriptomic evidence. The left ANNOTATION track  
 164 represents annotated genes. The RNAseq, RNAseq\_SE and RNAseq\_DL tracks  
 165 represent transcripts from different tissues. The green and red triangles represent the  
 166 start and end positions, respectively, of the ORF.

167

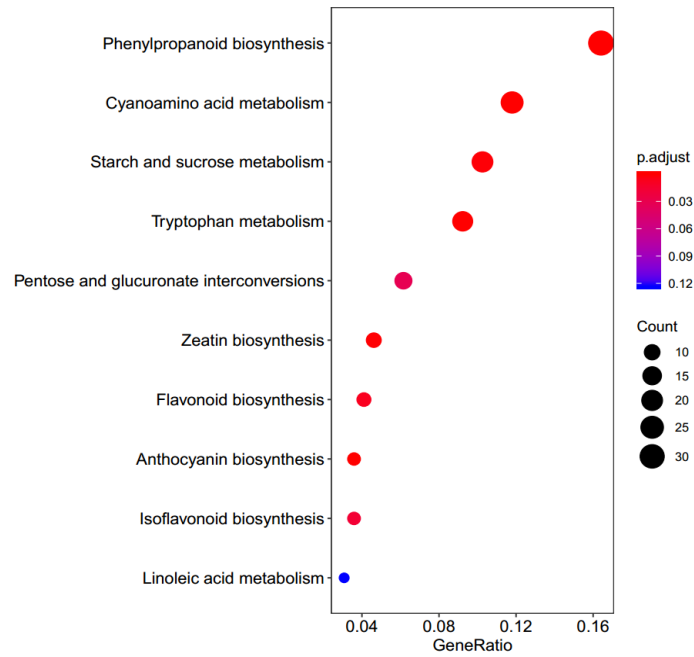

168

169 **Figure S8.** KEGG pathway enrichment of contracted gene families in mungbean.

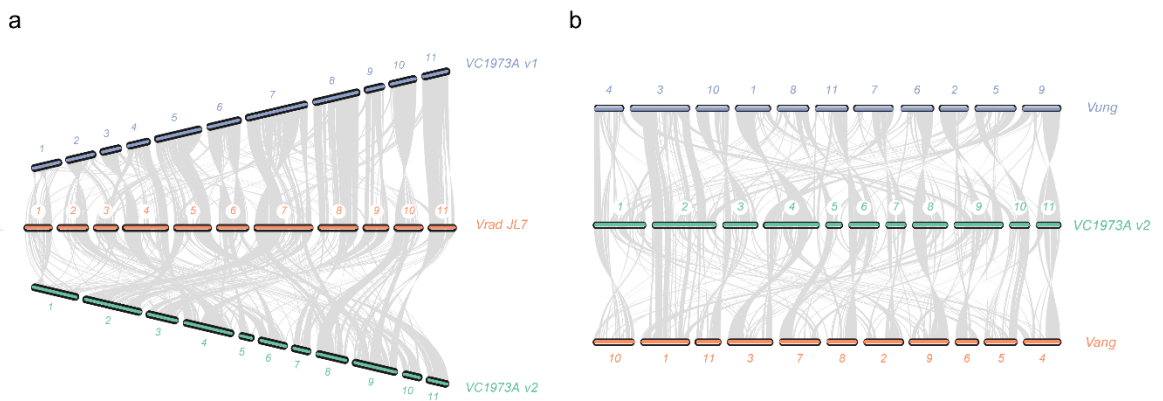

170

171 **Figure S9.** a Chromosome collinearity between Vrad\_JL7 and VC1973A (version 1

172 and version 2). b Chromosome collinearity between VC1973A version 2 and adzuki

173 bean (*Vang*) and cowpea (*Vung*).

174

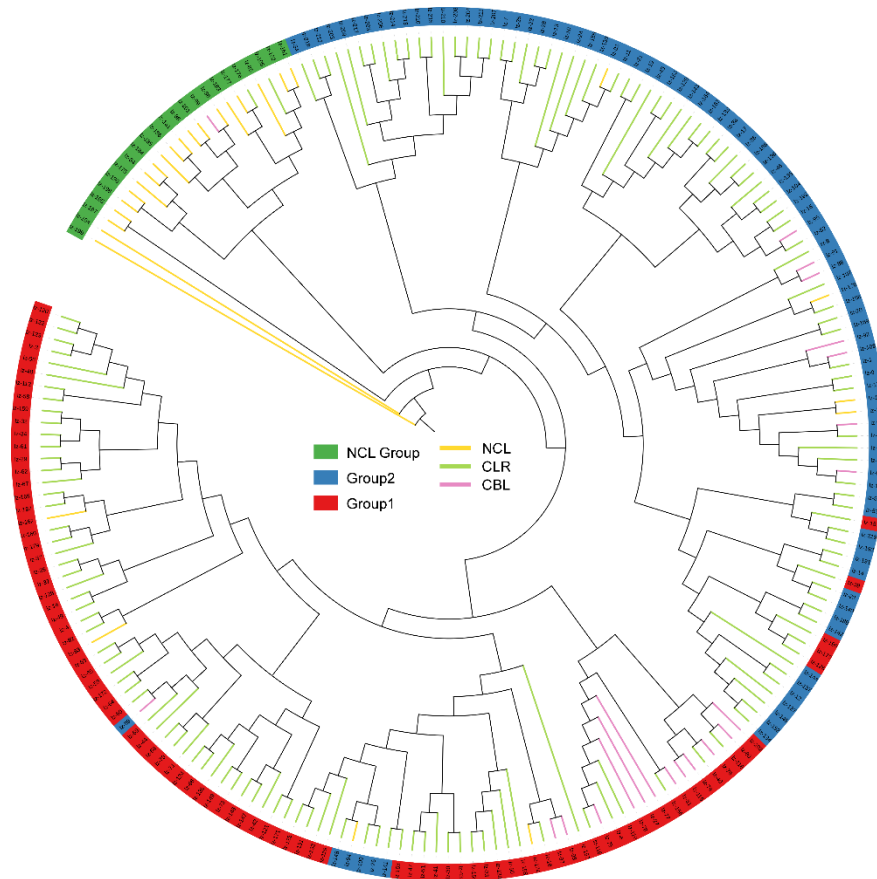

175

176 **Figure S10.** Hierarchical clustering results of 217 mungbean accessions based on the  
 177 PAV gene.

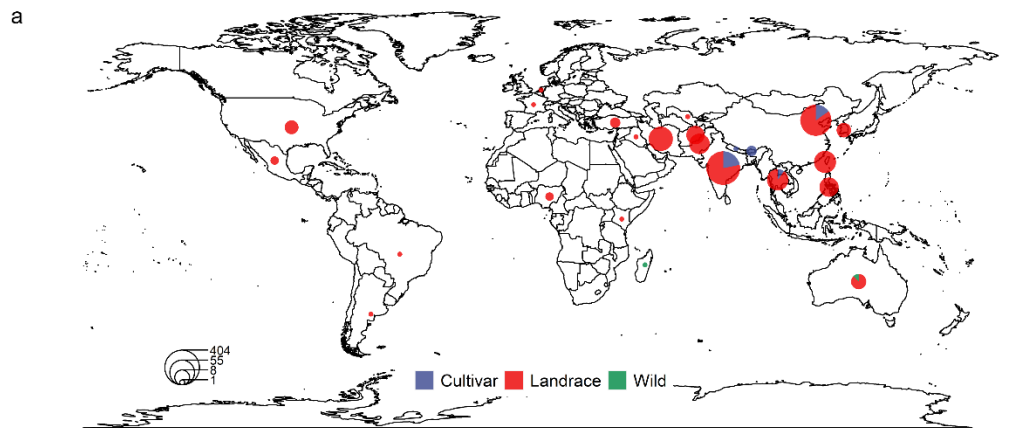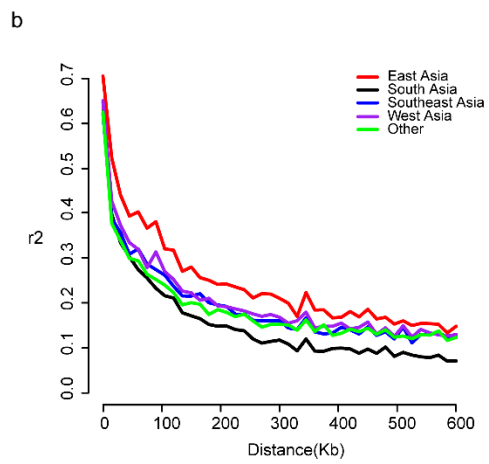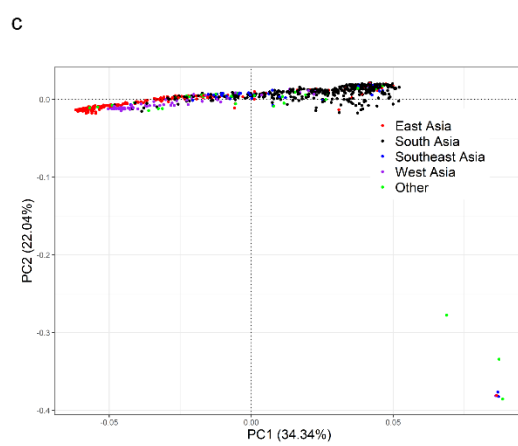

178

179 **Figure S11.** Information on 750 mungbean germplasm accessions from around the  
 180 world. a. Geographical distribution; b. LD decay of different subpopulations; c. PCA.

181

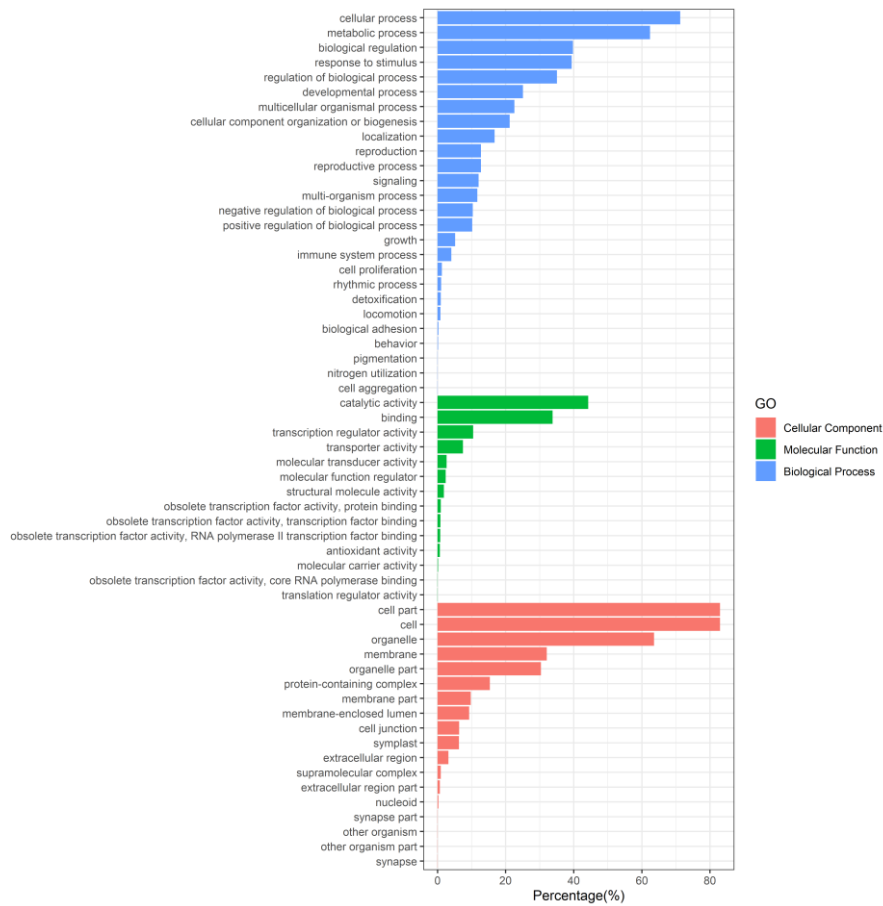

182

183 **Figure S12.** GO annotations of the core genes of the mungbean pan-genome.

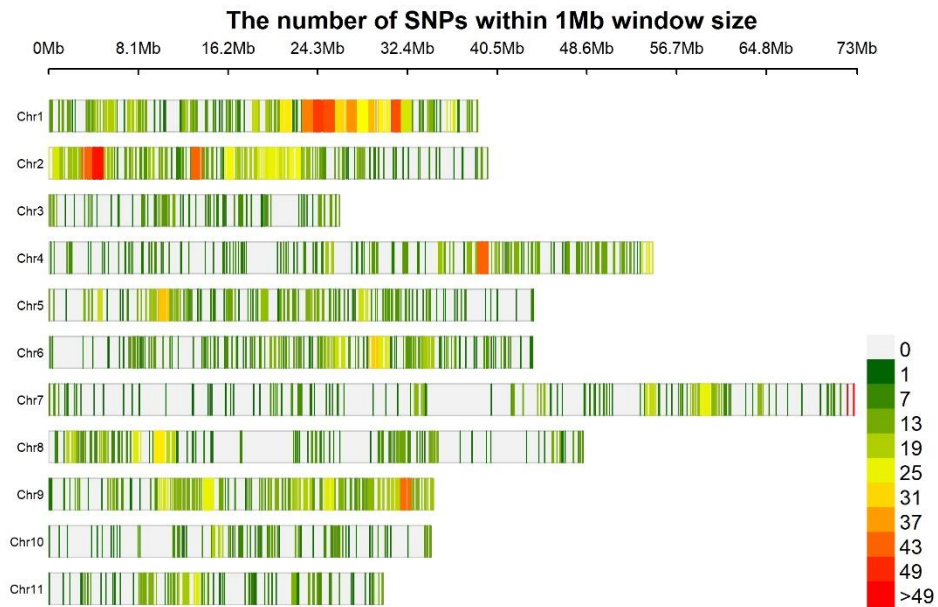

184

185 **Figure S13.** Density distribution of variable genes in the pan-genome of mungbean  
186 across 11 chromosomes.  
187

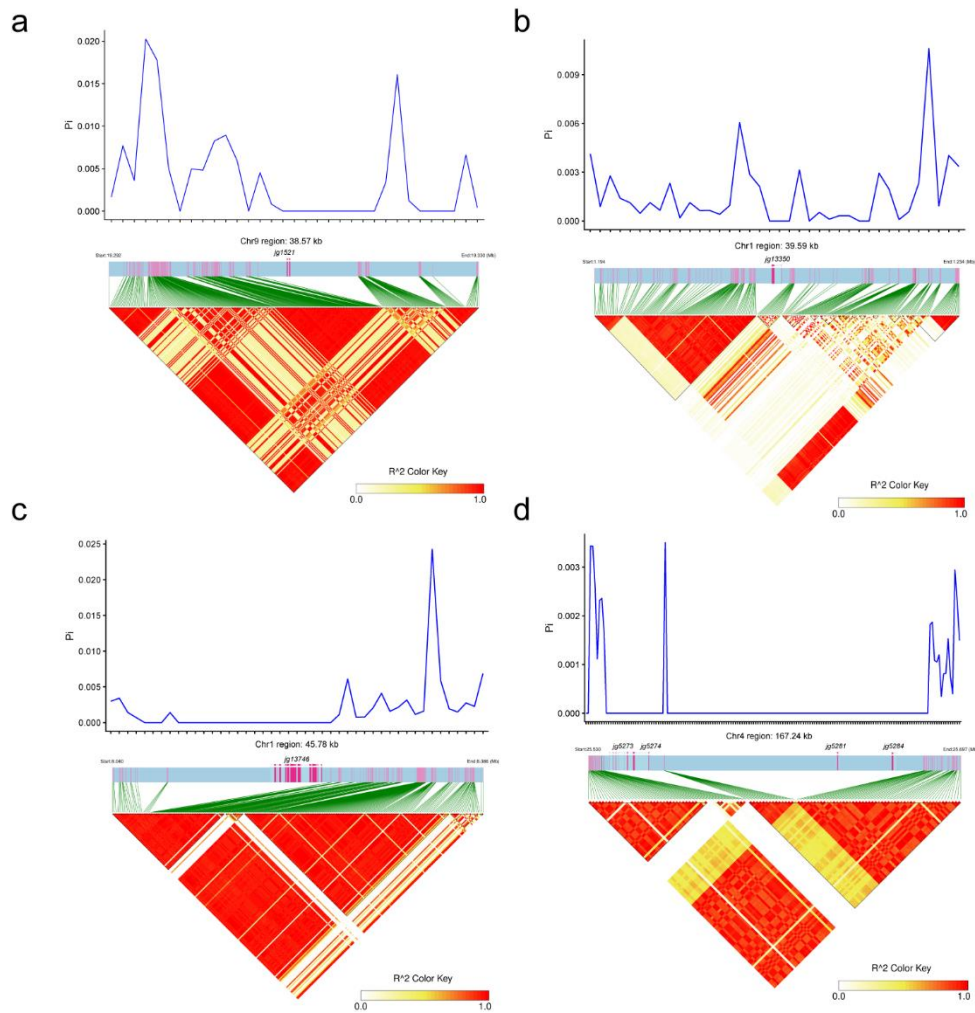

188  
189 **Figure S14.** LD and genetic diversity around PAVs associated with flowering  
190 regulation during adaptation. Included are seven genes from the reference genome,  
191 namely, (a) *jg1521*; (b) *jg13350*; (c) *jg13746*; (d) *jg5273*, *jg5274*, *jg5281* and *jg5284*.  
192



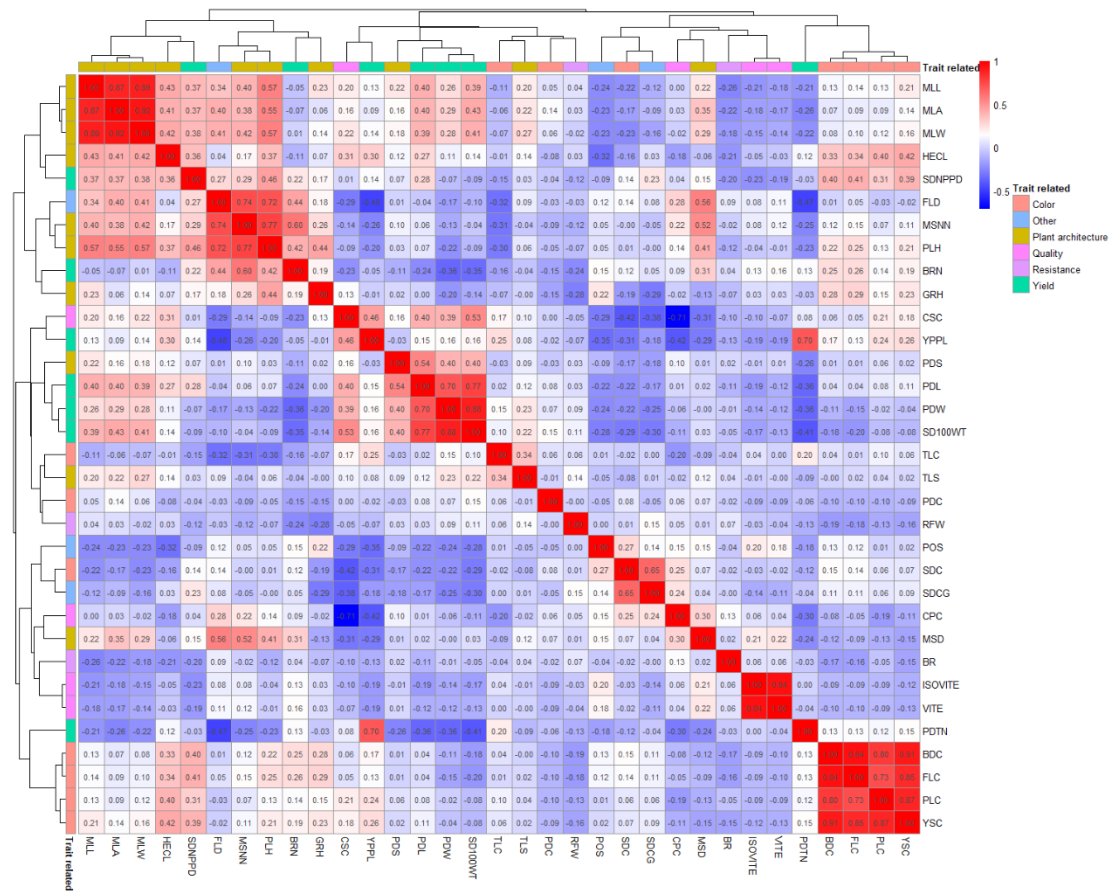

193

194 **Figure S15.** Heatmap of average phenotypic correlations in all the tested  
 195 environments.

196

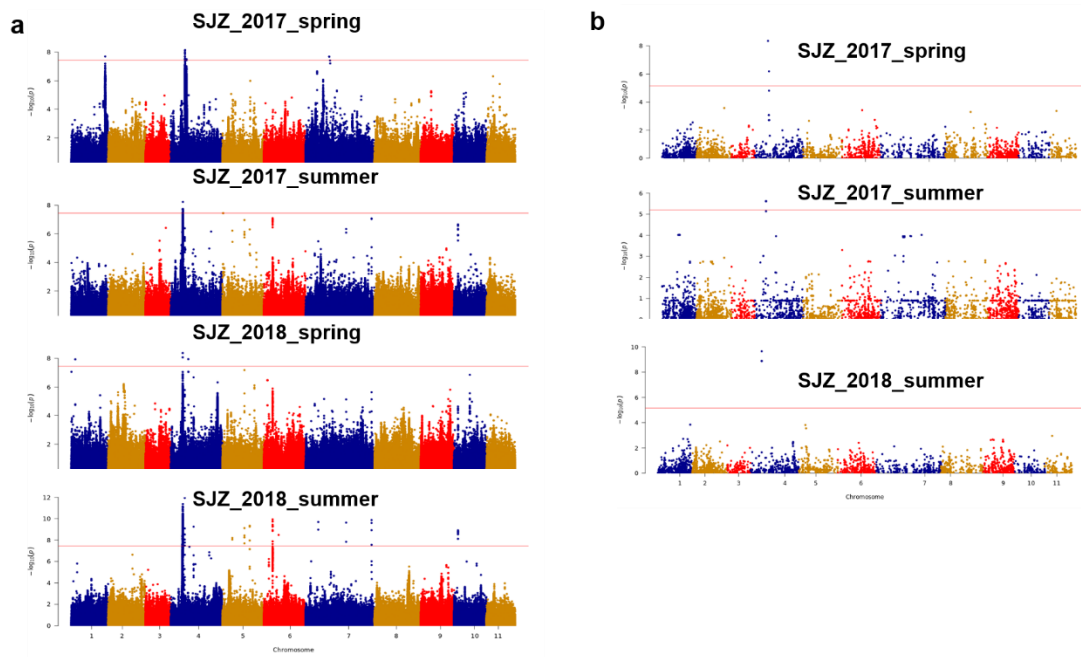

197

198 **Figure S16.** An example region (Chr. 4: 12~13 Mb) corresponding to the BRN trait  
 199 that was identified in multiple environments and by (a) a SNP GWAS and (b) a gene  
 200 PAV GWAS.

201

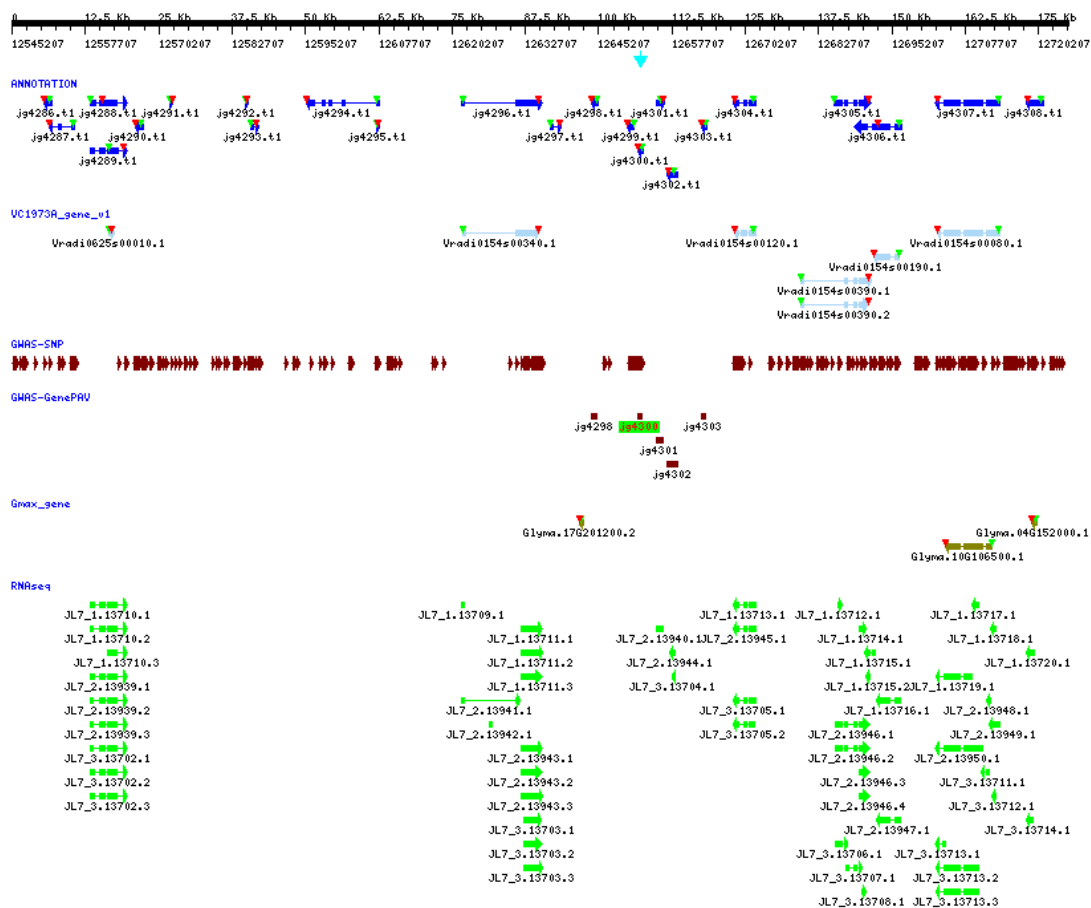

202

203 **Figure S17.** STA and GPTA events for the BRN trait in a 180 kb region. In the track  
 204 name shown on the left, ANNOTATION stands for the Vrad\_JL7 predicted gene.  
 205 VC1973A\_gene\_v1 represents the VC1973\_v1 predicted gene. The GWAS-SNPs  
 206 represent STAs, and each arrow represents an STA. GWAS-GenePAV represents the  
 207 GPTA genes, Gmax\_gene represents the corresponding soybean homologous genes,  
 208 and RNAseq represents the transcript evidence supporting the Vrad\_JL7 gene. The  
 209 green and red triangles represent the start and end positions, respectively, of the ORF.

210

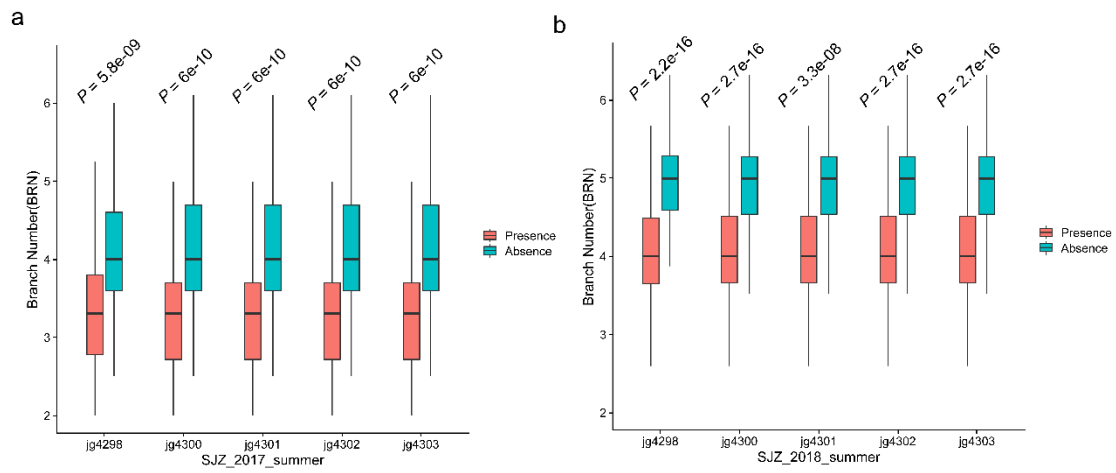

211

212 **Figure S18.** Relationships between the presence/absence of five genes and BRN in  
 213 different environments. The *P* value is the significance level calculated according to a  
 214 *t* test.

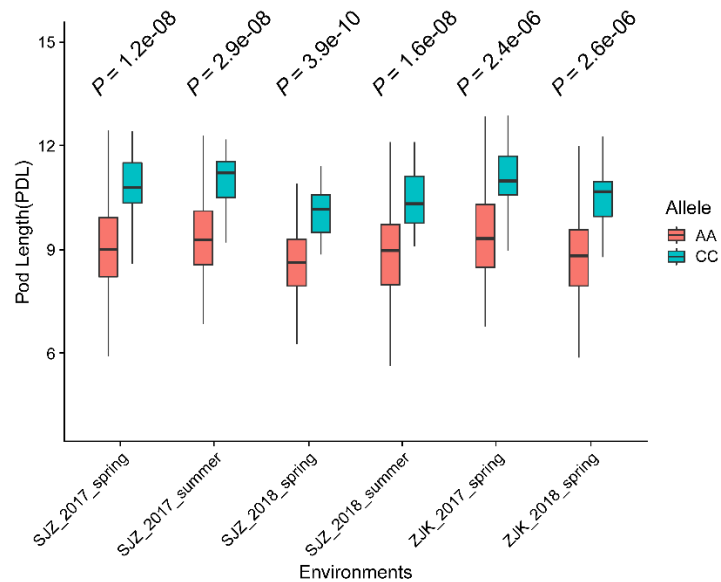

215

216 **Figure S19.** Relationships between different alleles of 7\_27965615\_A\_C and PDL in  
 217 different environments. The *P* value is the significance level calculated according to a  
 218 *t* test.

219

220

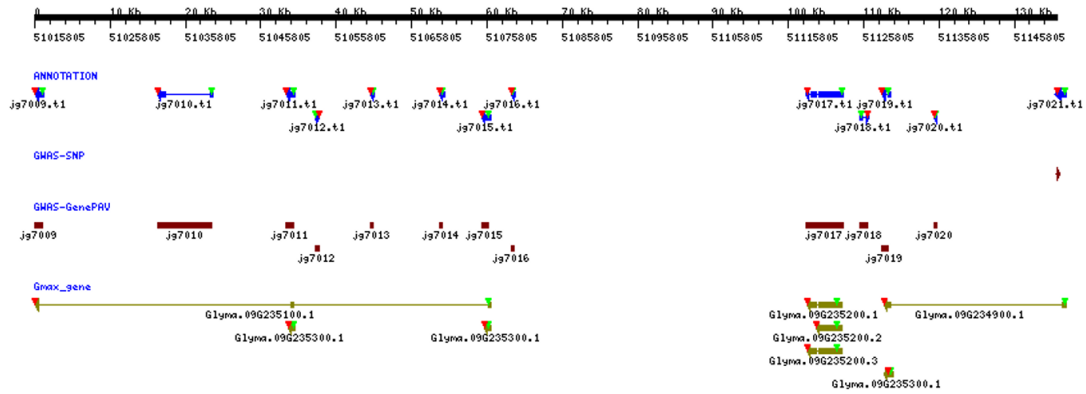

221

222 **Figure S20.** Gene PAV for colour-related traits and its corresponding soybean  
 223 homologues. In the track name shown on the left, ANNOTATION stands for the  
 224 Vrad\_JL7 predicted gene. GWAS-SNPs represent STAs, GWAS-GenePAV  
 225 represents the GPTA gene, and Gmax\_gene represents the corresponding soybean  
 226 homologous gene. The green and red triangles represent the start and end positions,  
 227 respectively, of the ORF.

228

229

230 **Supplemental Tables**

231

232

**Table S1 Classification and annotation of repetitive sequences in Vrad\_JL7 genome.**

| TE Classification |                | Copies  | Length (bp) | Percentage of genome (%) |
|-------------------|----------------|---------|-------------|--------------------------|
| Retrotransposon   | Total          | 249623  | 151659937   | 31.91                    |
|                   | LTR/Copia      | 118364  | 65,468,906  | 13.77                    |
|                   | LTR/Gypsy      | 101,662 | 79,136,575  | 16.65                    |
|                   | LTR/Unknown    | 44,433  | 11,413,863  | 2.40                     |
|                   | LTR/Cassandra  | 6,553   | 1,085,282   | 0.23                     |
|                   | LINE/L1        | 2409    | 818,921     | 0.17                     |
|                   | LINE/RTE-BovB  | 970     | 188,195     | 0.04                     |
|                   | LINE/I-Jockey  | 158     | 62,309      | 0.01                     |
|                   | SINE           | 565     | 96,361      | 0.02                     |
|                   | DNA transposon | Total   | 45187       | 20210548                 |
| CMC-EnSpm         |                | 18,772  | 11,296,708  | 2.38                     |
| MULE-MuDR         |                | 15,496  | 5,814,773   | 1.22                     |
| hAT-Ac            |                | 6,610   | 2,118,849   | 0.45                     |
| hAT-Tag1          |                | 1,561   | 401,633     | 0.08                     |
| PIF-Harbinger     |                | 1,317   | 519,528     | 0.11                     |
| hAT               |                | 1,096   | 241,623     | 0.05                     |
| TcMar-Mariner     |                | 801     | 133,277     | 0.03                     |
| hAT-Tip100        |                | 652     | 196,714     | 0.04                     |
| Crypton-H         |                | 346     | 100,356     | 0.02                     |
| IS3EU             |                | 295     | 57,010      | 0.01                     |
| hAT-Charlie       |                | 195     | 45,481      | 0.01                     |
| TcMar-Stowaway    |                | 188     | 23,927      | 0.01                     |
| Unknown           |                | 250881  | 66,173,679  | 13.92                    |
| Total             |                | 718,854 | 254,081,323 | 53.45                    |

**Table S2 The number of non-coding RNAs in Vrad\_JL7 genome.**

| Type                | Number |
|---------------------|--------|
| tRNA                | 681    |
| catalytic intron    | 59     |
| small nucleolar RNA | 410    |
| spliceosomal RNA    | 85     |
| microRNA            | 147    |
| 18S rRNA            | 123    |
| 28S rRNA            | 124    |
| 5S rRNA             | 4,078  |
| 5.8S rRNA           | 123    |

**Table S3 Gene family statistics of 13 species.**

| Species Name                        | Number of genes | Number of genes in orthogroups | Number of orthogroups containing species | Number of species-specific orthogroups | Number of genes in species-specific orthogroups |
|-------------------------------------|-----------------|--------------------------------|------------------------------------------|----------------------------------------|-------------------------------------------------|
| <i>Vigna radiata (Vrad)</i>         | 40,125          | 35,059                         | 19,335                                   | 1,532                                  | 5,482                                           |
| <i>Arachis duranensis (Adur)</i>    | 34,553          | 32,969                         | 16,415                                   | 568                                    | 4,966                                           |
| <i>Arabidopsis thaliana (Artha)</i> | 27,628          | 24,706                         | 14,294                                   | 981                                    | 4,734                                           |
| <i>Cicer arietinum (Cari)</i>       | 24,962          | 24,591                         | 16,036                                   | 142                                    | 824                                             |
| <i>Cajanus cajan (Ccaj)</i>         | 29,199          | 28,501                         | 16,936                                   | 157                                    | 478                                             |
| <i>Glycine max (Gmax)</i>           | 55,897          | 49,377                         | 18,622                                   | 578                                    | 1,795                                           |
| <i>Lotus japonicus (Ljap)</i>       | 39,734          | 34,093                         | 18,396                                   | 1,622                                  | 5,194                                           |
| <i>Medicago truncatula (Mtru)</i>   | 50,444          | 43,509                         | 19,007                                   | 1,567                                  | 7,948                                           |
| <i>Phaseolus lunatus (Plun)</i>     | 43,997          | 41,861                         | 17,645                                   | 397                                    | 6,708                                           |
| <i>Pisum sativum (Psat)</i>         | 44,756          | 39,036                         | 18,252                                   | 1,533                                  | 9,649                                           |
| <i>Phaseolus vulgaris (Pvul)</i>    | 28,134          | 27,203                         | 17,428                                   | 51                                     | 152                                             |
| <i>Vigna angularis (Vang)</i>       | 33,860          | 31,866                         | 17,555                                   | 532                                    | 2,921                                           |
| <i>Vigna unguiculata (Vung)</i>     | 28,314          | 27,874                         | 16,524                                   | 79                                     | 296                                             |

**Table S4 The 217 mungbean accessions and their sequenced information in our study.**

| No. | Sample ID | Accession   | Country | China Region | Province PRC | Categories | Group in Phylogenetic Tree | Clean Reads | Clean Base (Gb) | GC(%) | Q20(%) | Q30(%) | Mapped Reads | Mapped Rate(%) | Coverage Rate(%) | Mean Depth(X) |
|-----|-----------|-------------|---------|--------------|--------------|------------|----------------------------|-------------|-----------------|-------|--------|--------|--------------|----------------|------------------|---------------|
| 1   | lz-1      | Lvfeng 2    | China   | North        | Heilongjiang | CLR        | Group2                     | 43,466,324  | 6.52            | 35    | 95     | 93     | 43,392,425   | 99.16          | 92.88            | 11.60         |
| 2   | lz-2      | Lvzi 5      | China   | North        | Heilongjiang | CLR        | Group2                     | 50,785,548  | 7.62            | 34    | 96     | 94     | 49,908,099   | 97.66          | 93.13            | 13.48         |
| 3   | lz-3      | Lvzi 12     | China   | North        | Heilongjiang | CLR        | Group1                     | 45,038,980  | 6.76            | 34    | 97     | 95     | 45,092,931   | 99.71          | 95.26            | 12.22         |
| 4   | lz-4      | Lvzi 17     | China   | North        | Heilongjiang | CLR        | Group1                     | 43,475,982  | 6.52            | 34    | 97     | 95     | 43,540,326   | 99.64          | 94.72            | 11.86         |
| 5   | lz-5      | L2L173      | China   | North        | Liaoning     | CLR        | --                         | 44,509,506  | 6.68            | 36    | 97     | 94     | 44,307,746   | 98.95          | 93.41            | 12.02         |
| 6   | lz-6      | L2L177      | China   | North        | Liaoning     | CLR        | Group1                     | 45,178,974  | 6.78            | 36    | 97     | 95     | 44,983,620   | 99.16          | 95.10            | 12.22         |
| 7   | lz-7      | C001        | China   | North        | Neimenggu    | CLR        | Group2                     | 45,438,034  | 6.82            | 36    | 97     | 95     | 45,262,661   | 98.99          | 92.81            | 12.07         |
| 8   | lz-8      | C028        | China   | North        | Neimenggu    | CLR        | Group2                     | 41,956,054  | 6.29            | 35    | 97     | 95     | 41,824,620   | 99.10          | 92.91            | 11.29         |
| 9   | lz-9      | C029        | China   | North        | Neimenggu    | CLR        | Group2                     | 42,933,762  | 6.44            | 35    | 97     | 93     | 42,808,273   | 99.09          | 93.05            | 11.67         |
| 10  | lz-10     | C037        | China   | North        | Neimenggu    | CLR        | Group2                     | 45,022,496  | 6.75            | 35    | 97     | 94     | 44,905,646   | 99.14          | 93.18            | 11.98         |
| 11  | lz-11     | C046        | China   | North        | Neimenggu    | CLR        | Group2                     | 41,629,482  | 6.24            | 35    | 97     | 94     | 41,647,440   | 99.39          | 92.73            | 11.44         |
| 12  | lz-12     | C0072       | China   | North        | Hebei        | CLR        | Group2                     | 39,696,202  | 5.95            | 35    | 97     | 94     | 39,763,766   | 99.49          | 92.78            | 10.73         |
| 13  | lz-13     | C0427       | China   | North        | Shanxi       | CLR        | Group2                     | 46,107,244  | 6.92            | 35    | 96     | 93     | 46,204,495   | 99.55          | 92.58            | 12.58         |
| 14  | lz-14     | C0817       | China   | North        | Liaoning     | CLR        | Group2                     | 44,377,156  | 6.66            | 35    | 97     | 94     | 44,261,444   | 99.10          | 92.87            | 11.87         |
| 15  | lz-15     | C0967       | China   | North        | Shandong     | CLR        | Group2                     | 42,121,770  | 6.32            | 35    | 97     | 94     | 42,198,861   | 99.52          | 92.68            | 11.46         |
| 16  | lz-16     | C1018       | China   | North        | Shandong     | CLR        | Group1                     | 47,286,220  | 7.09            | 35    | 97     | 94     | 47,390,349   | 99.63          | 93.43            | 12.98         |
| 17  | lz-17     | C1065       | China   | North        | Shandong     | CLR        | Group2                     | 45,486,440  | 6.82            | 35    | 98     | 95     | 45,212,427   | 98.80          | 92.73            | 12.19         |
| 18  | lz-18     | C1257       | China   | North        | Shandong     | CLR        | Group1                     | 40,420,486  | 6.06            | 35    | 97     | 94     | 40,414,331   | 99.35          | 93.02            | 10.90         |
| 19  | lz-19     | Resource 6  | China   | North        | Shanxi       | CLR        | Group2                     | 44,899,414  | 6.73            | 35    | 97     | 94     | 44,848,881   | 99.22          | 92.72            | 12.24         |
| 20  | lz-20     | Resource 8  | China   | North        | Shanxi       | CLR        | Group2                     | 43,503,312  | 6.53            | 36    | 97     | 95     | 43,594,623   | 99.55          | 92.56            | 11.53         |
| 21  | lz-21     | Resource 9  | China   | North        | Shanxi       | CLR        | Group2                     | 45,014,248  | 6.75            | 36    | 96     | 93     | 44,859,661   | 98.97          | 92.49            | 11.99         |
| 22  | lz-22     | Resource 10 | China   | North        | Shanxi       | CLR        | Group2                     | 45,512,888  | 6.83            | 36    | 96     | 93     | 45,352,830   | 99.01          | 92.45            | 12.09         |
| 23  | lz-23     | Resource 11 | China   | North        | Shanxi       | CLR        | Group2                     | 46,162,346  | 6.92            | 35    | 97     | 95     | 46,083,206   | 99.23          | 93.35            | 12.74         |
| 24  | lz-24     | Resource 62 | China   | North        | Shanxi       | CLR        | Group2                     | 44,650,416  | 6.7             | 35    | 96     | 93     | 44,495,021   | 99.02          | 92.39            | 11.97         |
| 25  | lz-25     | Resource 66 | China   | North        | Shanxi       | CLR        | Group2                     | 44,472,598  | 6.67            | 35    | 97     | 94     | 44,329,783   | 99.06          | 92.89            | 12.15         |
| 26  | lz-26     | Yulv 1      | China   | North        | Shaanxi      | CLR        | Group1                     | 50,798,050  | 7.62            | 37    | 95     | 93     | 50,469,116   | 98.76          | 93.27            | 13.08         |
| 27  | lz-27     | Zhonglv 4   | China   | North        | Beijing      | CBL        | Group1                     | 47,003,870  | 7.05            | 38    | 96     | 93     | 46,642,987   | 98.63          | 94.06            | 12.70         |
| 28  | lz-28     | Lvzi 5      | China   | North        | Shaanxi      | CLR        | Group2                     | 40,395,574  | 6.06            | 35    | 96     | 94     | 40,388,184   | 99.36          | 92.27            | 10.99         |
| 29  | lz-29     | C1451       | China   | North        | Henan        | CLR        | Group1                     | 46,247,228  | 6.94            | 35    | 96     | 94     | 46,323,026   | 99.64          | 93.95            | 12.69         |
| 30  | lz-30     | C1463       | China   | North        | Henan        | CLR        | Group1                     | 49,367,470  | 7.41            | 34    | 96     | 94     | 49,415,669   | 99.54          | 93.55            | 13.52         |
| 31  | lz-32     | C1467       | China   | North        | Henan        | CLR        | Group1                     | 50,723,580  | 7.61            | 37    | 96     | 94     | 50,681,680   | 99.35          | 93.74            | 13.07         |
| 32  | lz-33     | C1475       | China   | North        | Henan        | CLR        | Group1                     | 47,061,114  | 7.06            | 34    | 97     | 94     | 47,133,081   | 99.57          | 93.89            | 12.96         |
| 33  | lz-34     | C1498       | China   | North        | Henan        | CLR        | Group1                     | 48,296,466  | 7.24            | 36    | 97     | 95     | 47,784,426   | 98.41          | 94.51            | 13.06         |
| 34  | lz-35     | C1509       | China   | North        | Henan        | CLR        | Group1                     | 43,469,472  | 6.52            | 36    | 97     | 94     | 43,211,041   | 98.83          | 93.92            | 11.75         |
| 35  | lz-36     | C1518       | China   | North        | Henan        | CLR        | Group2                     | 46,539,950  | 6.98            | 35    | 97     | 95     | 46,312,567   | 98.91          | 92.97            | 12.53         |
| 36  | lz-37     | C1527       | China   | North        | Henan        | CLR        | Group1                     | 42,995,068  | 6.45            | 36    | 97     | 94     | 42,893,510   | 99.17          | 93.56            | 11.47         |
| 37  | lz-38     | C1551       | China   | North        | Henan        | CLR        | Group2                     | 42,780,744  | 6.42            | 35    | 97     | 94     | 42,632,480   | 99.01          | 92.76            | 11.64         |
| 38  | lz-39     | C1556       | China   | North        | Henan        | CLR        | Group2                     | 45,838,458  | 6.88            | 37    | 97     | 94     | 44,596,447   | 96.59          | 92.96            | 11.98         |
| 39  | lz-40     | C1559       | China   | North        | Henan        | CLR        | Group1                     | 40,702,758  | 6.11            | 35    | 97     | 94     | 40,724,122   | 99.90          | 97.62            | 11.03         |
| 40  | lz-41     | C1567       | China   | North        | Henan        | CLR        | Group1                     | 41,264,612  | 6.19            | 37    | 97     | 94     | 40,887,267   | 98.38          | 92.78            | 10.73         |
| 41  | lz-42     | C1569       | China   | North        | Henan        | CLR        | Group1                     | 42,785,238  | 6.42            | 35    | 96     | 94     | 42,657,769   | 99.10          | 93.27            | 11.75         |
| 42  | lz-43     | C1580       | China   | North        | Henan        | CLR        | Group1                     | 40,531,242  | 6.08            | 35    | 97     | 96     | 40,570,530   | 99.45          | 92.91            | 11.08         |
| 43  | lz-44     | C1596       | China   | North        | Henan        | CLR        | Group1                     | 46,807,996  | 7.02            | 35    | 96     | 94     | 46,782,452   | 99.36          | 93.84            | 12.56         |
| 44  | lz-45     | C0882       | China   | North        | Shandong     | CLR        | Group2                     | 44,987,314  | 6.75            | 35    | 97     | 95     | 44,463,799   | 98.15          | 92.97            | 12.17         |
| 45  | lz-46     | C0886       | China   | North        | Shandong     | CLR        | Group2                     | 44,632,032  | 6.69            | 36    | 97     | 93     | 44,386,241   | 98.77          | 92.66            | 11.92         |
| 46  | lz-47     | C0891       | China   | North        | Shandong     | CLR        | Group1                     | 42,799,746  | 6.42            | 37    | 96     | 93     | 42,570,475   | 98.73          | 93.22            | 11.31         |
| 47  | lz-48     | C0907       | China   | North        | Shandong     | CLR        | Group1                     | 41,929,644  | 6.29            | 35    | 97     | 96     | 41,987,905   | 99.62          | 94.00            | 11.40         |
| 48  | lz-49     | C1009       | China   | North        | Shandong     | CLR        | Group1                     | 45,021,412  | 6.75            | 35    | 97     | 93     | 44,906,786   | 99.18          | 94.14            | 12.25         |
| 49  | lz-50     | C1052       | China   | North        | Shandong     | CLR        | Group1                     | 42,387,000  | 6.36            | 35    | 97     | 95     | 42,058,235   | 98.58          | 92.65            | 11.50         |
| 50  | lz-51     | C1061       | China   | North        | Shandong     | CLR        | Group1                     | 44,927,748  | 6.74            | 36    | 97     | 93     | 44,835,101   | 99.07          | 93.54            | 12.04         |
| 51  | lz-52     | C1084       | China   | North        | Shandong     | CLR        | Group2                     | 43,570,452  | 6.54            | 35    | 97     | 93     | 43,592,695   | 99.39          | 92.83            | 11.81         |
| 52  | lz-53     | AHYL2014-06 | China   | South        | Anhui        | CLR        | Group2                     | 47,548,812  | 7.13            | 35    | 97     | 94     | 47,573,106   | 99.39          | 92.70            | 12.88         |
| 53  | lz-54     | AHYL2014-07 | China   | South        | Anhui        | CLR        | Group2                     | 46,634,836  | 7               | 35    | 96     | 94     | 46,724,757   | 99.58          | 93.44            | 12.68         |
| 54  | lz-55     | AHYL2014-08 | China   | South        | Anhui        | CLR        | Group2                     | 48,383,560  | 7.26            | 35    | 97     | 94     | 48,166,064   | 98.97          | 92.63            | 13.21         |
| 55  | lz-56     | AHYL2014-19 | China   | South        | Anhui        | CLR        | Group1                     | 44,916,950  | 6.74            | 34    | 96     | 93     | 44,842,169   | 99.39          | 95.05            | 12.45         |
| 56  | lz-57     | LD109       | China   | South        | Hubei        | CLR        | Group1                     | 46,490,176  | 6.97            | 36    | 97     | 94     | 46,505,024   | 99.47          | 94.49            | 12.64         |
| 57  | lz-58     | LD127       | China   | South        | Hubei        | CLR        | Group1                     | 45,660,750  | 6.85            | 34    | 97     | 94     | 45,612,659   | 99.39          | 94.51            | 12.57         |
| 58  | lz-59     | LD128       | China   | South        | Hubei        | CLR        | Group1                     | 45,334,186  | 6.8             | 34    | 97     | 94     | 45,358,887   | 99.46          | 93.76            | 12.49         |
| 59  | lz-60     | LD135       | China   | South        | Hubei        | CLR        | Group1                     | 44,967,106  | 6.75            | 35    | 96     | 93     | 44,991,803   | 99.47          | 93.96            | 12.42         |
| 60  | lz-61     | LD142       | China   | South        | Hubei        | CLR        | Group1                     | 42,930,862  | 6.44            | 36    | 97     | 94     | 42,829,436   | 99.16          | 94.49            | 11.45         |
| 61  | lz-62     | LD163       | China   | South        | Hubei        | CLR        | Group1                     | 43,969,424  | 6.6             | 35    | 96     | 94     | 43,977,994   | 99.39          | 94.04            | 11.98         |
| 62  | lz-63     | LD175       | China   | South        | Hubei        | CLR        | Group1                     | 44,192,210  | 6.63            | 35    | 97     | 94     | 44,175,020   | 99.42          | 94.07            | 12.34         |
| 63  | lz-64     | LD235       | China   | South        | Hubei        | CLR        | Group1                     | 45,608,446  | 6.84            | 35    | 97     | 94     | 44,382,470   | 96.74          | 93.69            | 12.29         |
| 64  | lz-65     | LD251       | China   | South        | Hubei        | CLR        | Group1                     | 47,183,460  | 7.08            | 36    | 97     | 93     | 46,132,233   | 97.19          | 93.78            | 12.39         |
| 65  | lz-66     | LD264       | China   | South        | Hubei        | CLR        | Group1                     | 45,317,814  | 6.8             | 34    | 97     | 94     | 45,283,103   | 99.33          | 93.73            | 12.61         |
| 66  | lz-67     | LD274       | China   | South        | Hubei        | CLR        | Group1                     | 46,818,886  | 7.02            | 34    | 97     | 94     | 46,809,132   | 99.50          | 94.94            | 13.06         |
| 67  | lz-68     | Lvzi 1      | China   | South        | Chongqing    | CLR        | Group1                     | 42,904,172  | 6.44            | 34    | 97     | 95     | 42,958,543   | 99.49          | 93.08            | 11.85         |
| 68  | lz-69     | Lvzi 2      | China   | South        | Chongqing    | CLR        | Group1                     | 46,065,000  | 6.91            | 36    | 97     | 95     | 46,189,297   | 99.63          | 93.72            | 12.30         |
| 69  | lz-70     | Lvzi 3      | China   | South        | Chongqing    | CLR        | Group1                     | 47,033,276  | 7.05            | 34    | 97     | 95     | 47,096,672   | 99.54          | 93.79            | 12.99         |
| 70  | lz-71     | Lvzi 5      | China   | South        | Chongqing    | CLR        | Group1                     | 48,932,012  | 7.34            | 34    | 97     | 95     | 48,862,400   | 99.30          | 94.32            | 13.57         |
| 71  | lz-72     | Lvzi 10     | China   | South        | Chongqing    | CLR        | --                         | 47,627,124  | 7.14            | 35    | 96     | 93     | 47,623,382   | 99.39          | 93.46            | 13.03         |
| 72  | lz-73     | Lvdou 1     | China   | South        | Hainan       | CLR        | Group1                     | 42,032,416  | 6.3             | 35    | 97     | 94     | 42,117,168   | 99.54          | 95.13            | 11.39         |
| 73  | lz-74     | Lvdou 5     | China   | South        | Hainan       | CLR        | --                         | 45,629,496  | 6.84            | 35    | 97     | 95     | 45,549,292   | 99.26          | 93.94            | 12.40         |
| 74  | lz-75     | Jilv 2      | China   | North        | Hebei        | CBL        | Group1                     | 42,045,876  | 6.31            | 36    | 97     | 95     | 41,782,271   | 98.85          | 95.17            | 11.40         |
| 75  | lz-76     | Jilv 7      | China   | North        | Hebei        | CBL        | Group1                     | 45,326,608  | 6.8             | 35    | 97     | 95     | 45,321,625   | 99.79          | 97.29            | 12.67         |

|     |        |                 |       |       |              |     |           |            |      |    |    |    |            |       |       |       |
|-----|--------|-----------------|-------|-------|--------------|-----|-----------|------------|------|----|----|----|------------|-------|-------|-------|
| 76  | lz-77  | Jilv 9          | China | North | Hebei        | CBL | Group1    | 49,526,020 | 7.43 | 35 | 97 | 95 | 49,489,617 | 99.42 | 94.69 | 13.63 |
| 77  | lz-78  | Jilv 10         | China | North | Hebei        | CBL | Group1    | 43,673,484 | 6.55 | 35 | 97 | 96 | 43,156,933 | 98.42 | 94.92 | 11.87 |
| 78  | lz-79  | Jilv 11         | China | North | Hebei        | CBL | Group1    | 43,042,892 | 6.46 | 36 | 97 | 95 | 42,975,337 | 99.39 | 95.47 | 11.49 |
| 79  | lz-80  | Baolv 942       | China | North | Hebei        | CBL | Group1    | 40,922,226 | 6.14 | 38 | 97 | 95 | 40,446,125 | 98.20 | 93.40 | 10.51 |
| 80  | lz-81  | Bao 956-6       | China | North | Hebei        | CBL | Group1    | 43,528,846 | 6.53 | 35 | 97 | 95 | 43,551,020 | 99.51 | 95.22 | 11.88 |
| 81  | lz-82  | aoding White Pt | China | North | Hebei        | CLR | Group1    | 43,810,862 | 6.57 | 36 | 97 | 95 | 43,461,534 | 98.80 | 95.60 | 11.80 |
| 82  | lz-83  | Zhonglv 5       | Other | --    | --           | NCL | NCL Group | 42,418,378 | 6.36 | 35 | 97 | 96 | 42,475,812 | 99.65 | 93.99 | 11.82 |
| 83  | lz-84  | Zhonglv 8       | Other | --    | --           | NCL | NCL Group | 40,638,588 | 6.1  | 35 | 97 | 95 | 40,709,667 | 99.58 | 93.54 | 11.27 |
| 84  | lz-85  | Zhonglv 11      | Other | --    | --           | NCL | NCL Group | 57,156,902 | 8.57 | 35 | 97 | 95 | 57,208,537 | 99.52 | 93.88 | 15.75 |
| 85  | lz-86  | Zhonglv 12      | Other | --    | --           | NCL | NCL Group | 46,395,580 | 6.96 | 36 | 97 | 95 | 46,266,125 | 99.02 | 93.33 | 12.47 |
| 86  | lz-87  | Zhonglv 14      | China | North | Beijing      | CBL | Group2    | 53,962,430 | 8.09 | 37 | 97 | 95 | 54,059,365 | 99.39 | 93.27 | 14.23 |
| 87  | lz-88  | Bailv 9         | China | North | Liaoning     | CBL | Group2    | 54,509,064 | 8.18 | 35 | 97 | 96 | 54,668,949 | 99.67 | 93.00 | 14.64 |
| 88  | lz-89  | Bailv 11        | China | North | Liaoning     | CBL | Group1    | 46,631,102 | 6.99 | 36 | 96 | 93 | 46,665,214 | 99.49 | 94.29 | 12.56 |
| 89  | lz-90  | Ji Lv 5         | China | North | Jilin        | CBL | Group2    | 47,951,366 | 7.19 | 36 | 97 | 96 | 47,772,872 | 99.02 | 93.29 | 12.98 |
| 90  | lz-91  | Ji Lv 6         | China | North | Jilin        | CBL | Group2    | 41,248,540 | 6.19 | 35 | 97 | 95 | 41,301,385 | 99.44 | 92.67 | 11.13 |
| 91  | lz-92  | Ji Lv 7         | China | North | Jilin        | CBL | Group2    | 59,770,998 | 8.97 | 37 | 96 | 94 | 59,840,665 | 99.43 | 93.30 | 15.71 |
| 92  | lz-93  | Jinlv 1         | China | North | Shanxi       | NCL | Group2    | 49,590,486 | 7.44 | 36 | 96 | 94 | 49,646,274 | 99.38 | 92.87 | 13.27 |
| 93  | lz-94  | Jinlv 3         | China | North | Shanxi       | NCL | Group1    | 42,658,574 | 6.4  | 35 | 96 | 94 | 41,871,283 | 97.55 | 93.40 | 11.37 |
| 94  | lz-95  | Jinlv 4         | China | North | Shanxi       | CBL | Group2    | 48,135,684 | 7.22 | 35 | 96 | 94 | 48,212,296 | 99.51 | 92.66 | 13.10 |
| 95  | lz-96  | Weilv 4         | Other | --    | --           | NCL | NCL Group | 51,227,522 | 7.68 | 35 | 97 | 95 | 51,333,007 | 99.47 | 92.97 | 13.86 |
| 96  | lz-97  | Weilv 7         | China | North | Shandong     | CBL | Group1    | 51,639,854 | 7.75 | 35 | 96 | 94 | 51,709,660 | 99.51 | 93.89 | 14.17 |
| 97  | lz-98  | Weilv 8         | China | North | Shandong     | CBL | Group1    | 50,000,816 | 7.5  | 37 | 96 | 94 | 50,020,921 | 99.19 | 93.02 | 13.46 |
| 98  | lz-99  | Weilv 2116      | China | North | Shandong     | CBL | Group2    | 44,666,692 | 6.7  | 35 | 95 | 92 | 44,653,309 | 99.36 | 93.81 | 12.07 |
| 99  | lz-100 | Weilv 2118      | China | North | Shandong     | CBL | --        | 48,026,628 | 7.2  | 35 | 96 | 94 | 47,937,177 | 99.18 | 92.18 | 12.97 |
| 100 | lz-101 | Weilv 9002-341  | China | North | Shandong     | CBL | --        | 49,235,476 | 7.39 | 36 | 96 | 94 | 49,199,569 | 99.17 | 93.94 | 13.15 |
| 101 | lz-102 | Liaolv 6        | Other | --    | --           | NCL | Group2    | 42,781,128 | 6.42 | 35 | 96 | 94 | 25,551,068 | 99.23 | 92.39 | 6.97  |
| 102 | lz-103 | Liaolv 10       | Other | --    | --           | NCL | Group2    | 41,228,160 | 6.18 | 35 | 96 | 94 | 41,233,253 | 99.40 | 93.03 | 11.14 |
| 103 | lz-104 | Yingge          | China | North | Hebei        | CLR | Group2    | 45,523,150 | 6.83 | 35 | 97 | 95 | 44,202,794 | 96.54 | 93.12 | 12.20 |
| 104 | lz-105 | Dayinggelv 985  | China | North | Jilin        | CLR | --        | 51,735,212 | 7.76 | 36 | 97 | 95 | 51,369,888 | 98.24 | 91.18 | 13.60 |
| 105 | lz-106 | axinchangming   | China | North | Zhejiang     | CLR | Group2    | 46,083,956 | 6.91 | 35 | 97 | 95 | 46,015,973 | 99.21 | 94.29 | 12.67 |
| 106 | lz-107 | Minglv 1        | China | South | Anhui        | CLR | Group2    | 49,496,708 | 7.42 | 35 | 97 | 95 | 49,556,022 | 99.50 | 93.32 | 13.38 |
| 107 | lz-108 | Nenlv 1         | China | North | Heilongjiang | CBL | Group2    | 40,128,088 | 6.02 | 37 | 97 | 96 | 40,149,990 | 99.34 | 92.94 | 10.67 |
| 108 | lz-109 | Yulin           | China | North | Shaanxi      | CLR | Group1    | 42,858,576 | 6.43 | 35 | 97 | 95 | 42,900,981 | 99.56 | 93.62 | 11.41 |
| 109 | lz-110 | Nanyang         | China | North | Henan        | CLR | Group1    | 41,777,892 | 6.27 | 35 | 97 | 96 | 41,717,047 | 99.40 | 95.23 | 11.58 |
| 110 | lz-111 | Xilv 1          | China | North | Shaanxi      | CLR | Group2    | 43,018,396 | 6.45 | 36 | 97 | 95 | 42,998,744 | 99.32 | 93.19 | 11.52 |
| 111 | lz-112 | Qingshuihe      | China | North | Neimenggu    | CLR | Group1    | 45,737,030 | 6.86 | 35 | 97 | 95 | 45,712,493 | 99.46 | 94.90 | 12.64 |
| 112 | lz-113 | Henan black     | China | North | Henan        | CLR | Group2    | 50,168,524 | 7.53 | 35 | 97 | 95 | 50,098,852 | 99.30 | 93.34 | 13.74 |
| 113 | lz-114 | Bobai           | China | South | Anhui        | CLR | Group2    | 44,893,944 | 6.73 | 36 | 96 | 94 | 44,985,299 | 99.58 | 93.10 | 12.00 |
| 114 | lz-115 | Sukang 2        | China | North | Jiangsu      | CBL | Group1    | 47,154,200 | 7.07 | 35 | 97 | 95 | 47,185,226 | 99.65 | 95.91 | 13.04 |
| 115 | lz-116 | HBM0001         | China | North | Hebei        | CLR | Group1    | 48,531,040 | 7.28 | 35 | 97 | 94 | 48,552,849 | 99.63 | 95.31 | 13.34 |
| 116 | lz-117 | HBM0005         | China | North | Hebei        | CLR | --        | 46,337,342 | 6.95 | 35 | 97 | 95 | 46,423,706 | 99.55 | 93.90 | 12.73 |
| 117 | lz-118 | HBM0007         | China | North | Hebei        | CLR | Group1    | 40,011,412 | 6    | 35 | 97 | 95 | 40,068,581 | 99.62 | 94.93 | 11.07 |
| 118 | lz-119 | HBM0014         | China | North | Hebei        | CLR | Group1    | 45,133,746 | 6.77 | 36 | 97 | 95 | 44,338,472 | 97.55 | 93.28 | 12.09 |
| 119 | lz-120 | HBM0016         | China | North | Hebei        | CLR | Group1    | 44,461,532 | 6.67 | 36 | 97 | 96 | 44,384,308 | 99.31 | 95.09 | 11.96 |
| 120 | lz-121 | HBM0018         | China | North | Hebei        | CLR | Group1    | 50,396,590 | 7.56 | 38 | 97 | 95 | 49,381,194 | 97.27 | 93.19 | 13.09 |
| 121 | lz-122 | HBM0019         | China | North | Hebei        | CLR | Group1    | 46,215,870 | 6.93 | 35 | 97 | 95 | 46,257,344 | 99.60 | 95.31 | 12.89 |
| 122 | lz-123 | HBM0021         | China | North | Hebei        | CLR | Group1    | 47,413,386 | 7.11 | 36 | 97 | 95 | 47,473,249 | 99.56 | 95.15 | 12.73 |
| 123 | lz-124 | HBM0026         | China | North | Hebei        | CLR | Group1    | 41,047,022 | 6.16 | 35 | 97 | 96 | 41,130,806 | 99.67 | 94.17 | 11.26 |
| 124 | lz-125 | HBM0031         | China | North | Hebei        | CLR | Group1    | 46,051,838 | 6.91 | 36 | 97 | 95 | 46,202,314 | 99.67 | 92.97 | 12.15 |
| 125 | lz-126 | C0073           | China | North | Hebei        | CLR | Group2    | 43,194,186 | 6.48 | 35 | 97 | 95 | 43,187,336 | 99.39 | 93.29 | 11.71 |
| 126 | lz-127 | C0078           | China | North | Hebei        | CLR | Group2    | 45,732,916 | 6.86 | 36 | 97 | 95 | 45,824,729 | 99.50 | 93.42 | 12.29 |
| 127 | lz-128 | C0081           | China | North | Hebei        | CLR | Group1    | 41,054,800 | 6.16 | 36 | 97 | 95 | 40,804,348 | 98.79 | 93.46 | 11.13 |
| 128 | lz-129 | C0113           | China | North | Hebei        | CLR | Group2    | 51,428,680 | 7.71 | 39 | 97 | 95 | 51,525,244 | 99.24 | 92.43 | 13.36 |
| 129 | lz-130 | C0126           | China | North | Hebei        | CLR | Group1    | 41,390,672 | 6.21 | 36 | 97 | 94 | 41,416,189 | 99.29 | 93.71 | 11.04 |
| 130 | lz-131 | C0134           | China | North | Hebei        | CLR | Group1    | 44,349,482 | 6.65 | 36 | 97 | 96 | 44,372,942 | 99.48 | 92.79 | 11.80 |
| 131 | lz-132 | C0162           | China | North | Hebei        | CLR | Group1    | 40,622,434 | 6.09 | 35 | 97 | 96 | 40,652,789 | 99.42 | 92.93 | 11.14 |
| 132 | lz-133 | C0166           | China | North | Hebei        | CLR | Group2    | 48,936,216 | 7.34 | 35 | 97 | 96 | 49,019,709 | 99.50 | 92.88 | 13.41 |
| 133 | lz-134 | C0167           | China | North | Hebei        | CLR | Group2    | 45,933,526 | 6.89 | 35 | 97 | 95 | 46,004,209 | 99.48 | 92.95 | 12.57 |
| 134 | lz-135 | C0189           | China | North | Hebei        | CLR | Group2    | 47,952,712 | 7.19 | 35 | 97 | 95 | 48,022,702 | 99.48 | 92.86 | 12.92 |
| 135 | lz-136 | C0194           | China | North | Hebei        | CLR | Group1    | 45,408,556 | 6.81 | 35 | 97 | 95 | 45,479,571 | 99.65 | 93.96 | 12.40 |
| 136 | lz-137 | C0195           | China | North | Hebei        | CLR | Group2    | 40,485,012 | 6.07 | 36 | 97 | 95 | 40,332,028 | 98.94 | 93.00 | 10.79 |
| 137 | lz-138 | C0196           | China | North | Hebei        | CLR | Group2    | 44,456,358 | 6.67 | 35 | 97 | 96 | 44,530,238 | 99.55 | 92.80 | 11.85 |
| 138 | lz-140 | C0208           | China | North | Hebei        | CLR | Group2    | 42,448,640 | 6.37 | 35 | 97 | 95 | 42,140,927 | 98.68 | 92.69 | 11.38 |
| 139 | lz-141 | C0218           | China | North | Hebei        | CLR | Group1    | 42,753,008 | 6.41 | 35 | 97 | 95 | 42,516,975 | 98.82 | 93.68 | 11.57 |
| 140 | lz-142 | C0223           | China | North | Hebei        | CLR | Group2    | 42,090,518 | 6.31 | 35 | 97 | 94 | 42,096,582 | 99.37 | 92.88 | 11.42 |
| 141 | lz-143 | C0227           | China | North | Hebei        | CLR | Group2    | 46,644,068 | 7    | 35 | 97 | 95 | 46,696,558 | 99.43 | 92.82 | 12.64 |
| 142 | lz-144 | C0228           | China | North | Hebei        | CLR | Group2    | 50,188,750 | 7.53 | 35 | 97 | 96 | 50,044,962 | 99.10 | 93.17 | 13.72 |
| 143 | lz-145 | C0230           | China | North | Hebei        | CLR | Group2    | 47,943,158 | 7.19 | 35 | 97 | 94 | 47,971,578 | 99.46 | 93.02 | 13.10 |
| 144 | lz-146 | C0249           | China | North | Hebei        | CLR | Group1    | 47,215,928 | 7.08 | 35 | 97 | 96 | 47,281,243 | 99.61 | 93.67 | 12.91 |
| 145 | lz-147 | C0251           | China | North | Hebei        | CLR | Group1    | 44,973,464 | 6.75 | 36 | 97 | 96 | 44,902,886 | 99.19 | 93.71 | 11.93 |
| 146 | lz-148 | C0274           | China | North | Hebei        | CLR | Group1    | 44,216,116 | 6.63 | 35 | 97 | 96 | 44,209,580 | 99.41 | 93.43 | 12.10 |
| 147 | lz-149 | C0279           | China | North | Hebei        | CLR | Group1    | 45,472,112 | 6.82 | 37 | 97 | 95 | 45,208,735 | 98.86 | 93.97 | 12.45 |
| 148 | lz-150 | C0286           | China | North | Hebei        | CLR | Group2    | 46,454,212 | 6.97 | 35 | 97 | 96 | 46,595,440 | 99.65 | 92.70 | 12.90 |
| 149 | lz-151 | C0289           | China | North | Hebei        | CLR | Group2    | 41,794,182 | 6.27 | 35 | 97 | 95 | 41,883,364 | 99.61 | 92.96 | 11.36 |
| 150 | lz-152 | C0292           | China | North | Hebei        | CLR | Group2    | 54,709,598 | 8.21 | 36 | 97 | 95 | 54,791,347 | 99.48 | 92.68 | 14.84 |
| 151 | lz-153 | C0300           | China | North | Hebei        | CLR | Group2    | 55,584,832 | 8.34 | 36 | 97 | 96 | 55,726,456 | 99.58 | 92.49 | 14.95 |
| 152 | lz-154 | C0320           | China | North | Hebei        | CLR | Group1    | 46,907,098 | 7.04 | 35 | 97 | 94 | 46,981,445 | 99.62 | 93.88 | 12.61 |
| 153 | lz-155 | C0350           | China | North | Hebei        | CLR | Group2    | 47,106,126 | 7.07 | 36 | 97 | 94 | 46,109,914 | 97.15 | 92.44 | 12.45 |
| 154 | lz-156 | C0655           | China | North | Neimenggu    | CLR | Group1    | 40,416,326 | 6.06 | 35 | 97 | 95 | 40,500,150 | 99.66 | 94.62 | 11.09 |
| 155 | lz-157 | C1039           | China | North | Shandong     | CLR | Group1    | 40,341,214 | 6.05 | 38 | 97 | 95 | 39,766,846 | 97.74 | 92.19 | 10.56 |
| 156 | lz-158 | C1595           | China | North | Henan        | CLR | Group1    | 43,916,248 | 6.   |    |    |    |            |       |       |       |

|     |        |                 |             |       |           |     |           |            |      |    |    |    |            |       |       |       |
|-----|--------|-----------------|-------------|-------|-----------|-----|-----------|------------|------|----|----|----|------------|-------|-------|-------|
| 157 | lz-159 | C1710           | China       | South | Hubei     | CLR | Group1    | 44,417,992 | 6.66 | 36 | 97 | 94 | 44,277,920 | 99.15 | 94.56 | 11.79 |
| 158 | lz-160 | C1718           | China       | South | Hubei     | CLR | Group1    | 49,400,904 | 7.41 | 35 | 97 | 96 | 49,492,839 | 99.57 | 94.21 | 13.26 |
| 159 | lz-161 | 3408(VC1973A)   | Other       | --    | --        | NCL | NCL Group | 49,298,068 | 7.39 | 35 | 97 | 94 | 49,026,867 | 98.93 | 94.58 | 13.50 |
| 160 | lz-162 | C3419           | Other       | --    | --        | NCL | NCL Group | 44,432,444 | 6.66 | 35 | 97 | 96 | 44,426,240 | 99.42 | 94.02 | 12.19 |
| 161 | lz-163 | C3677           | Other       | --    | --        | CLR | Group1    | 44,195,714 | 6.63 | 36 | 97 | 94 | 44,056,876 | 98.97 | 92.89 | 11.82 |
| 162 | lz-164 | C3682           | China       | North | Hebei     | CLR | Group2    | 45,931,836 | 6.89 | 35 | 97 | 95 | 45,999,150 | 99.56 | 92.57 | 12.25 |
| 163 | lz-165 | C3692           | China       | North | Hebei     | CLR | Group1    | 40,766,134 | 6.11 | 35 | 97 | 95 | 40,724,705 | 99.43 | 94.73 | 11.26 |
| 164 | lz-166 | C3733           | China       | North | Hebei     | CLR | --        | 46,632,448 | 6.99 | 36 | 97 | 95 | 46,773,618 | 99.64 | 92.80 | 12.55 |
| 165 | lz-167 | C3739           | China       | North | Hebei     | CLR | Group2    | 45,575,662 | 6.84 | 36 | 97 | 94 | 45,690,885 | 99.59 | 92.40 | 12.19 |
| 166 | lz-168 | C3812           | China       | North | Jilin     | CLR | Group2    | 43,790,986 | 6.57 | 35 | 97 | 96 | 43,895,760 | 99.63 | 92.98 | 11.72 |
| 167 | lz-169 | C3860           | China       | North | Liaoning  | CLR | Group2    | 47,107,240 | 7.07 | 35 | 97 | 96 | 47,158,200 | 99.50 | 93.07 | 12.71 |
| 168 | lz-170 | C3866           | China       | North | Liaoning  | CLR | Group2    | 50,238,236 | 7.54 | 35 | 97 | 95 | 50,196,870 | 99.38 | 93.20 | 13.82 |
| 169 | lz-171 | C4344           | China       | North | Liaoning  | CLR | Group1    | 43,500,662 | 6.53 | 38 | 97 | 95 | 42,373,998 | 96.67 | 92.89 | 11.15 |
| 170 | lz-172 | C4356           | China       | South | Hunan     | CLR | Group1    | 42,264,742 | 6.34 | 35 | 97 | 95 | 42,299,256 | 99.43 | 93.56 | 11.56 |
| 171 | lz-173 | C4435           | China       | North | Beijing   | CLR | Group2    | 50,065,320 | 7.51 | 35 | 97 | 95 | 49,997,901 | 99.25 | 93.42 | 13.54 |
| 172 | lz-174 | C4466           | Other       | --    | --        | NCL | NCL Group | 49,576,198 | 7.44 | 35 | 97 | 94 | 49,377,209 | 98.94 | 93.10 | 13.37 |
| 173 | lz-175 | C4468           | Philippines | --    | --        | NCL | NCL Group | 42,360,968 | 6.35 | 35 | 97 | 95 | 42,449,418 | 99.50 | 92.98 | 11.58 |
| 174 | lz-176 | C4635           | Other       | --    | --        | CLR | Group2    | 44,751,246 | 6.71 | 39 | 97 | 94 | 44,821,287 | 99.31 | 92.18 | 11.46 |
| 175 | lz-177 | C4640           | Other       | --    | --        | NCL | NCL Group | 43,822,438 | 6.57 | 35 | 97 | 95 | 43,835,526 | 99.51 | 94.21 | 11.80 |
| 176 | lz-178 | C4706           | Other       | --    | --        | NCL | NCL Group | 49,220,634 | 7.38 | 35 | 97 | 94 | 49,252,027 | 99.50 | 93.18 | 13.17 |
| 177 | lz-179 | C5879           | China       | South | Hubei     | CLR | Group1    | 46,938,296 | 7.04 | 35 | 97 | 94 | 46,728,157 | 98.95 | 95.41 | 12.85 |
| 178 | lz-180 | C5883           | China       | North | Neimenggu | CLR | --        | 43,499,880 | 6.52 | 35 | 97 | 95 | 43,491,488 | 99.42 | 93.92 | 11.87 |
| 179 | lz-181 | VC3541B         | Other       | --    | --        | NCL | NCL Group | 47,276,980 | 7.09 | 37 | 97 | 94 | 47,198,959 | 99.10 | 93.19 | 12.35 |
| 180 | lz-182 | VC4503B         | Other       | --    | --        | NCL | NCL Group | 45,168,670 | 6.78 | 37 | 97 | 95 | 44,951,947 | 98.88 | 94.13 | 12.34 |
| 181 | lz-183 | VC5734A         | Other       | --    | --        | NCL | NCL Group | 42,109,008 | 6.32 | 35 | 97 | 95 | 41,905,974 | 98.83 | 92.54 | 11.30 |
| 182 | lz-184 | VC6089A         | Other       | --    | --        | NCL | NCL Group | 41,952,334 | 6.29 | 35 | 96 | 93 | 41,923,212 | 99.28 | 92.99 | 11.46 |
| 183 | lz-185 | VC6144B         | Other       | --    | --        | NCL | NCL Group | 49,522,792 | 7.43 | 35 | 97 | 94 | 49,464,178 | 99.14 | 93.31 | 13.57 |
| 184 | lz-186 | VC6379          | Other       | --    | --        | NCL | NCL Group | 47,170,246 | 7.08 | 35 | 97 | 94 | 47,324,968 | 99.54 | 92.46 | 12.71 |
| 185 | lz-187 | C0185           | China       | North | Hebei     | CLR | Group1    | 44,747,690 | 6.71 | 35 | 96 | 94 | 44,652,836 | 99.35 | 94.80 | 12.35 |
| 186 | lz-188 | C0076           | China       | North | Hebei     | CLR | Group2    | 42,686,498 | 6.4  | 35 | 96 | 93 | 42,724,010 | 99.42 | 92.69 | 11.64 |
| 187 | lz-189 | C0205           | China       | North | Hebei     | CLR | Group2    | 46,849,028 | 7.03 | 35 | 96 | 93 | 46,652,943 | 98.95 | 93.12 | 12.58 |
| 188 | lz-190 | C0229           | China       | North | Hebei     | CLR | Group2    | 46,096,774 | 6.91 | 35 | 96 | 93 | 45,919,591 | 99.02 | 93.19 | 12.57 |
| 189 | lz-191 | C0305           | China       | North | Hebei     | CLR | Group2    | 49,314,556 | 7.4  | 35 | 96 | 93 | 48,732,206 | 98.20 | 93.05 | 13.17 |
| 190 | lz-192 | C0328           | China       | North | Hebei     | CLR | Group2    | 45,379,086 | 6.81 | 35 | 96 | 93 | 45,017,700 | 98.61 | 92.90 | 12.19 |
| 191 | lz-193 | C0337           | China       | North | Hebei     | CLR | Group2    | 48,269,668 | 7.24 | 35 | 95 | 92 | 48,235,359 | 99.37 | 93.60 | 12.88 |
| 192 | lz-194 | TC1966          | Madagascar  | --    | --        | NCL | NCL Group | 51,900,836 | 7.79 | 36 | 94 | 92 | 52,099,523 | 98.59 | 85.75 | 12.80 |
| 193 | lz-195 | V1128           | India       | --    | --        | NCL | NCL Group | 45,893,882 | 6.88 | 35 | 96 | 94 | 45,563,897 | 98.40 | 91.34 | 12.16 |
| 194 | lz-196 | V2802           | Philippines | --    | --        | NCL | NCL Group | 45,064,212 | 6.76 | 35 | 96 | 94 | 44,955,378 | 99.02 | 92.36 | 12.23 |
| 195 | lz-197 | V2709           | India       | --    | --        | NCL | NCL Group | 47,791,142 | 7.17 | 35 | 96 | 94 | 47,802,108 | 98.98 | 90.61 | 12.71 |
| 196 | lz-198 | V2817           | Nigeria     | --    | --        | NCL | NCL Group | 43,671,086 | 6.55 | 35 | 97 | 94 | 43,421,561 | 98.71 | 92.37 | 11.82 |
| 197 | lz-199 | ACC41           | Australia   | --    | --        | NCL | NCL Group | 47,081,342 | 7.06 | 35 | 96 | 95 | 47,611,107 | 98.80 | 93.37 | 11.35 |
| 198 | lz-200 | Jilv 13         | China       | North | Hebei     | CBL | --        | 47,327,610 | 7.1  | 35 | 96 | 93 | 47,263,319 | 99.42 | 94.55 | 13.04 |
| 199 | lz-201 | VC2917          | Other       | --    | --        | NCL | NCL Group | 40,382,718 | 6.06 | 35 | 97 | 95 | 40,158,846 | 98.82 | 93.02 | 10.92 |
| 200 | lz-202 | Jilv 0509       | China       | North | Hebei     | CBL | Group1    | 41,969,274 | 6.3  | 36 | 95 | 93 | 41,696,404 | 98.84 | 93.79 | 10.78 |
| 201 | lz-203 | L133            | China       | North | Hebei     | CLR | Group2    | 42,962,392 | 6.44 | 36 | 96 | 94 | 41,612,019 | 96.19 | 92.59 | 11.07 |
| 202 | lz-204 | L131            | China       | North | Hebei     | CLR | Group2    | 46,833,766 | 7.03 | 35 | 96 | 92 | 45,355,218 | 96.20 | 92.94 | 12.13 |
| 203 | lz-205 | L177            | China       | North | Hebei     | CLR | Group2    | 46,847,004 | 7.03 | 34 | 96 | 92 | 46,920,719 | 99.46 | 92.76 | 12.91 |
| 204 | lz-206 | L098            | China       | North | Hebei     | CLR | Group2    | 45,710,840 | 6.86 | 35 | 96 | 92 | 45,402,459 | 98.64 | 92.64 | 12.01 |
| 205 | lz-207 | YLD022          | China       | North | Hebei     | CLR | Group2    | 47,129,600 | 7.07 | 34 | 96 | 93 | 46,985,689 | 99.00 | 92.83 | 12.89 |
| 206 | lz-208 | YLD003          | China       | North | Hebei     | CLR | Group2    | 41,926,054 | 6.29 | 34 | 96 | 92 | 41,550,284 | 98.43 | 92.88 | 11.45 |
| 207 | lz-209 | WM11-6          | China       | North | Tianjin   | CLR | Group2    | 48,324,166 | 7.25 | 35 | 96 | 93 | 48,423,399 | 99.49 | 92.65 | 13.00 |
| 208 | lz-210 | WM11-9          | China       | North | Shandong  | CLR | Group2    | 49,701,174 | 7.46 | 34 | 96 | 93 | 49,168,080 | 98.20 | 92.69 | 13.52 |
| 209 | lz-211 | L042            | China       | North | Hebei     | CLR | Group2    | 49,439,704 | 7.42 | 35 | 96 | 93 | 48,552,299 | 97.53 | 92.71 | 13.33 |
| 210 | lz-212 | WM11-7          | China       | North | Shandong  | CLR | Group2    | 44,404,544 | 6.66 | 34 | 96 | 93 | 44,479,861 | 99.50 | 93.00 | 12.18 |
| 211 | lz-213 | Liaoning 27     | China       | North | Liaoning  | CLR | Group2    | 45,622,616 | 6.84 | 36 | 96 | 92 | 45,702,379 | 99.46 | 92.47 | 12.02 |
| 212 | lz-214 | L167            | China       | North | Hebei     | CLR | Group2    | 46,500,422 | 6.98 | 35 | 96 | 92 | 46,479,749 | 99.24 | 92.72 | 12.58 |
| 213 | lz-215 | L174            | China       | North | Hebei     | CLR | Group2    | 46,019,014 | 6.9  | 34 | 96 | 92 | 46,077,933 | 99.48 | 92.74 | 12.40 |
| 214 | lz-216 | L165            | China       | North | Hebei     | CLR | Group2    | 46,610,112 | 6.99 | 35 | 95 | 92 | 46,389,101 | 98.86 | 93.00 | 12.62 |
| 215 | lz-217 | L179            | China       | North | Hebei     | CLR | Group2    | 44,973,618 | 6.75 | 34 | 96 | 93 | 44,972,366 | 99.26 | 92.73 | 12.44 |
| 216 | lz-218 | L161            | China       | North | Hebei     | CLR | Group2    | 44,405,134 | 6.66 | 35 | 96 | 93 | 44,121,490 | 98.65 | 92.81 | 12.04 |
| 217 | lz-219 | Jiangsu wild 19 | China       | South | Jiangsu   | CLR | Group2    | 44,508,828 | 6.68 | 34 | 96 | 93 | 44,606,560 | 99.50 | 92.85 | 12.30 |



**Table S5 Summary of SNP locations: detection of SNP loci classified according to coding (intron or exon) or non-coding and intergenic regions on all 11 chromosomes (Chr. 1 to Chr.11) of the mungbean genome.**

|                                   | Chr.1           | Chr.2           | Chr.3           | Chr.4           | Chr.5           | Chr.6           | Chr.7           | Chr.8           | Chr.9           | Chr.10          | Chr.11          | Unplaced       | Total            |
|-----------------------------------|-----------------|-----------------|-----------------|-----------------|-----------------|-----------------|-----------------|-----------------|-----------------|-----------------|-----------------|----------------|------------------|
| Total                             | 255,066         | 253,428         | 101,950         | 264,479         | 164,166         | 261,463         | 291,312         | 195,318         | 225,503         | 117,205         | 95,596          | 3,857          | 2,229,343        |
| Intergenic                        | 191,382         | 196,452         | 69,868          | 197,759         | 126,928         | 200,553         | 221,064         | 143,857         | 169,180         | 89,556          | 66,421          | 3,426          | 1,676,446        |
| Intron                            | 60,462          | 52,384          | 29,563          | 56,194          | 33,534          | 51,058          | 60,032          | 43,226          | 50,219          | 25,411          | 26,681          | 312            | 489,076          |
| Exon                              | 12,825          | 10,903          | 6,772           | 14,366          | 7,467           | 13,668          | 14,568          | 10,373          | 10,032          | 5,668           | 6,321           | 85             | 113,048          |
| Downstream                        | 104,231         | 99,316          | 54,876          | 122,313         | 71,544          | 106,461         | 129,904         | 97,295          | 86,294          | 48,248          | 49,275          | 800            | 970,557          |
| Upstream                          | 104,542         | 94,341          | 55,156          | 129,952         | 74,177          | 113,649         | 135,805         | 99,179          | 88,047          | 48,458          | 50,876          | 798            | 994,980          |
| Splicing                          | 948             | 818             | 647             | 1,101           | 649             | 1,069           | 1,263           | 915             | 828             | 454             | 549             | 12             | 9,253            |
| UTR_3_PRIME                       | 5,782           | 4,790           | 3,518           | 7,364           | 3,843           | 6,517           | 8,443           | 5,776           | 4,323           | 2,660           | 3,261           | 39             | 56,316           |
| UTR_5_PRIME                       | 3,509           | 3,368           | 2,450           | 4,656           | 2,734           | 3,383           | 4,890           | 4,338           | 2,888           | 1,892           | 2,450           | 12             | 36,570           |
| Number Non-synonymous(Percentage) | 6933<br>(2.72%) | 6054<br>(2.39%) | 3522<br>(3.45%) | 7670<br>(2.90%) | 4137<br>(2.52%) | 7487<br>(2.86%) | 7874<br>(2.70%) | 5547<br>(2.84%) | 5608<br>(2.49%) | 3185<br>(2.72%) | 3432<br>(3.59%) | 58<br>(1.50%)  | 61507<br>(2.76%) |
| Number Synonymous(Percentage)     | 5609<br>(2.93%) | 4657<br>(2.37%) | 3186<br>(4.56%) | 6538<br>(3.31%) | 3168<br>(2.50%) | 5998<br>(2.99%) | 6482<br>(2.93%) | 4679<br>(3.25%) | 4260<br>(2.52%) | 2374<br>(2.65%) | 2771<br>(4.17%) | 106<br>(3.09%) | 49828<br>(2.97%) |

**Table S6 Summary of SNP identified in 217 mungbean genotypes.**

| <b>Sample ID</b> | <b>Total SNPs</b> | <b>Reference SNPs</b> | <b>Heterozygous SNPs</b> | <b>Homozygous SNPs</b> | <b>Synonymous SNPs</b> | <b>Non-synonymous SNPs</b> | <b>Ratio</b> |
|------------------|-------------------|-----------------------|--------------------------|------------------------|------------------------|----------------------------|--------------|
| lz-1             | 2,076,105         | 1,311,057             | 179,883                  | 585,165                | 39,845                 | 54,530                     | 1.3686       |
| lz-10            | 2,120,691         | 1,319,816             | 211,395                  | 589,480                | 40,679                 | 55,656                     | 1.3682       |
| lz-100           | 2,158,663         | 1,339,589             | 173,752                  | 645,322                | 41,674                 | 56,661                     | 1.3596       |
| lz-101           | 2,152,114         | 1,281,000             | 190,466                  | 680,648                | 41,456                 | 56,559                     | 1.3643       |
| lz-102           | 1,815,102         | 1,171,436             | 150,615                  | 493,051                | 36,402                 | 49,605                     | 1.3627       |
| lz-103           | 2,142,043         | 1,379,259             | 176,157                  | 586,627                | 41,311                 | 56,354                     | 1.3641       |
| lz-104           | 2,166,271         | 1,362,390             | 187,375                  | 616,506                | 41,622                 | 56,805                     | 1.3648       |
| lz-105           | 2,119,586         | 1,144,025             | 210,884                  | 764,677                | 41,149                 | 55,733                     | 1.3544       |
| lz-106           | 2,138,648         | 1,406,274             | 227,801                  | 504,573                | 41,241                 | 55,973                     | 1.3572       |
| lz-107           | 2,179,130         | 1,368,614             | 190,107                  | 620,409                | 41,799                 | 57,037                     | 1.3646       |
| lz-108           | 2,074,427         | 1,308,432             | 185,845                  | 580,150                | 40,860                 | 55,630                     | 1.3615       |
| lz-109           | 2,148,037         | 1,436,280             | 169,800                  | 541,957                | 41,290                 | 56,425                     | 1.3666       |
| lz-11            | 2,137,856         | 1,287,037             | 201,846                  | 648,973                | 41,171                 | 56,145                     | 1.3637       |
| lz-110           | 2,142,655         | 1,716,204             | 108,145                  | 318,306                | 41,189                 | 56,176                     | 1.3639       |
| lz-111           | 2,151,979         | 1,384,372             | 179,629                  | 587,978                | 41,373                 | 56,543                     | 1.3667       |
| lz-112           | 2,169,256         | 1,639,514             | 127,018                  | 402,724                | 41,640                 | 56,763                     | 1.3632       |
| lz-113           | 2,190,263         | 1,408,779             | 182,701                  | 598,783                | 41,952                 | 57,261                     | 1.3649       |
| lz-114           | 2,150,275         | 1,380,586             | 182,932                  | 586,757                | 41,461                 | 56,622                     | 1.3657       |
| lz-115           | 2,167,601         | 1,785,121             | 92,491                   | 289,989                | 41,601                 | 56,820                     | 1.3658       |
| lz-116           | 2,169,234         | 1,774,540             | 104,686                  | 290,008                | 41,632                 | 56,884                     | 1.3664       |
| lz-117           | 2,154,914         | 1,361,798             | 167,929                  | 625,187                | 41,223                 | 56,360                     | 1.3672       |
| lz-118           | 2,115,352         | 1,453,567             | 279,572                  | 382,213                | 40,735                 | 55,625                     | 1.3655       |
| lz-119           | 2,131,874         | 1,376,756             | 182,326                  | 572,792                | 41,112                 | 56,117                     | 1.3650       |
| lz-12            | 2,116,326         | 1,273,495             | 197,210                  | 645,621                | 40,652                 | 55,617                     | 1.3681       |
| lz-120           | 2,139,643         | 1,598,613             | 127,431                  | 413,599                | 41,105                 | 56,147                     | 1.3659       |
| lz-121           | 2,118,309         | 1,334,045             | 197,865                  | 586,399                | 41,262                 | 56,414                     | 1.3672       |
| lz-122           | 2,175,600         | 1,654,415             | 120,810                  | 400,375                | 41,750                 | 56,942                     | 1.3639       |
| lz-123           | 2,145,198         | 1,661,902             | 113,521                  | 369,775                | 41,388                 | 56,595                     | 1.3674       |
| lz-124           | 2,137,931         | 1,488,662             | 162,846                  | 486,423                | 41,324                 | 56,303                     | 1.3625       |
| lz-125           | 2,152,704         | 1,326,558             | 194,692                  | 631,454                | 41,445                 | 56,535                     | 1.3641       |
| lz-126           | 2,151,094         | 1,369,275             | 178,915                  | 602,904                | 41,408                 | 56,447                     | 1.3632       |
| lz-127           | 2,149,771         | 1,247,020             | 341,592                  | 561,159                | 41,404                 | 56,567                     | 1.3662       |
| lz-128           | 2,101,248         | 1,372,746             | 170,593                  | 557,909                | 40,612                 | 55,612                     | 1.3693       |
| lz-129           | 2,102,939         | 1,246,278             | 207,193                  | 649,468                | 41,362                 | 56,359                     | 1.3626       |
| lz-13            | 2,116,187         | 1,265,832             | 204,209                  | 646,146                | 40,852                 | 55,763                     | 1.3650       |
| lz-130           | 2,107,376         | 1,335,079             | 253,191                  | 519,106                | 40,609                 | 55,460                     | 1.3657       |
| lz-131           | 2,153,195         | 1,326,552             | 195,631                  | 631,012                | 41,623                 | 56,700                     | 1.3622       |
| lz-132           | 2,138,952         | 1,263,874             | 205,239                  | 669,839                | 41,258                 | 56,191                     | 1.3619       |
| lz-133           | 2,183,667         | 1,315,448             | 202,832                  | 665,387                | 41,918                 | 57,143                     | 1.3632       |
| lz-134           | 2,170,461         | 1,325,765             | 193,201                  | 651,495                | 41,601                 | 56,708                     | 1.3631       |
| lz-135           | 2,177,533         | 1,272,947             | 210,668                  | 693,918                | 41,780                 | 56,972                     | 1.3636       |
| lz-136           | 2,161,722         | 1,469,201             | 168,904                  | 523,617                | 41,627                 | 56,807                     | 1.3647       |
| lz-137           | 2,109,279         | 1,330,256             | 186,672                  | 592,351                | 40,717                 | 55,633                     | 1.3663       |
| lz-138           | 2,153,511         | 1,280,089             | 202,931                  | 670,491                | 41,597                 | 56,643                     | 1.3617       |
| lz-14            | 2,153,058         | 1,322,395             | 190,428                  | 640,235                | 41,232                 | 56,318                     | 1.3659       |
| lz-140           | 2,143,057         | 1,294,910             | 192,936                  | 655,211                | 41,420                 | 56,492                     | 1.3639       |
| lz-141           | 2,136,171         | 1,134,185             | 391,601                  | 610,385                | 41,242                 | 56,125                     | 1.3609       |

|        |           |           |         |         |        |        |        |
|--------|-----------|-----------|---------|---------|--------|--------|--------|
| lz-142 | 2,145,801 | 1,291,985 | 192,013 | 661,803 | 41,335 | 56,411 | 1.3647 |
| lz-143 | 2,172,408 | 1,302,715 | 201,145 | 668,548 | 41,721 | 56,915 | 1.3642 |
| lz-144 | 2,190,860 | 1,355,919 | 194,530 | 640,411 | 41,968 | 57,207 | 1.3631 |
| lz-145 | 2,179,602 | 1,321,063 | 196,143 | 662,396 | 41,862 | 57,074 | 1.3634 |
| lz-146 | 2,175,195 | 1,457,955 | 181,012 | 536,228 | 41,773 | 56,967 | 1.3637 |
| lz-147 | 2,122,409 | 1,354,065 | 297,176 | 471,168 | 40,795 | 55,910 | 1.3705 |
| lz-148 | 2,165,407 | 1,432,194 | 171,643 | 561,570 | 41,538 | 56,628 | 1.3633 |
| lz-149 | 2,117,025 | 1,522,057 | 157,252 | 437,716 | 41,743 | 56,906 | 1.3632 |
| lz-15  | 2,145,693 | 1,280,865 | 204,092 | 660,736 | 41,166 | 56,135 | 1.3636 |
| lz-150 | 2,179,596 | 1,301,442 | 207,990 | 670,164 | 41,809 | 56,946 | 1.3621 |
| lz-151 | 2,150,305 | 1,278,814 | 247,505 | 623,986 | 41,350 | 56,346 | 1.3627 |
| lz-152 | 2,191,001 | 1,337,814 | 198,194 | 654,993 | 41,911 | 57,287 | 1.3669 |
| lz-153 | 2,188,150 | 1,254,363 | 220,973 | 712,814 | 41,987 | 57,275 | 1.3641 |
| lz-154 | 2,167,802 | 1,430,975 | 164,014 | 572,813 | 41,590 | 56,699 | 1.3633 |
| lz-155 | 2,139,156 | 1,252,063 | 212,372 | 674,721 | 41,164 | 56,175 | 1.3647 |
| lz-156 | 2,095,824 | 1,166,817 | 566,318 | 362,689 | 40,795 | 55,438 | 1.3589 |
| lz-157 | 1,975,391 | 1,249,747 | 199,468 | 526,176 | 38,944 | 53,564 | 1.3754 |
| lz-158 | 2,152,385 | 1,302,567 | 199,210 | 650,608 | 41,363 | 56,446 | 1.3646 |
| lz-159 | 2,132,257 | 1,497,227 | 168,705 | 466,325 | 41,171 | 56,033 | 1.3610 |
| lz-16  | 2,160,945 | 1,380,432 | 182,876 | 597,637 | 41,467 | 56,591 | 1.3647 |
| lz-160 | 2,169,887 | 1,466,382 | 161,270 | 542,235 | 41,662 | 56,830 | 1.3641 |
| lz-161 | 2,167,155 | 1,477,260 | 138,155 | 551,740 | 41,557 | 56,819 | 1.3673 |
| lz-162 | 2,155,048 | 1,375,443 | 179,970 | 599,635 | 41,472 | 56,383 | 1.3595 |
| lz-163 | 2,104,064 | 1,281,450 | 201,158 | 621,456 | 40,427 | 55,360 | 1.3694 |
| lz-164 | 2,156,657 | 1,253,174 | 221,164 | 682,319 | 41,554 | 56,629 | 1.3628 |
| lz-165 | 2,130,647 | 1,565,009 | 130,529 | 435,109 | 41,255 | 56,246 | 1.3634 |
| lz-166 | 2,113,301 | 1,359,638 | 171,414 | 582,249 | 41,152 | 56,223 | 1.3662 |
| lz-167 | 2,158,460 | 1,280,513 | 208,295 | 669,652 | 41,624 | 56,704 | 1.3623 |
| lz-168 | 2,153,312 | 1,356,675 | 187,025 | 609,612 | 41,539 | 56,574 | 1.3619 |
| lz-169 | 2,170,068 | 1,360,819 | 192,769 | 616,480 | 41,664 | 56,790 | 1.3630 |
| lz-17  | 2,163,933 | 1,307,169 | 195,244 | 661,520 | 41,617 | 56,740 | 1.3634 |
| lz-170 | 2,188,951 | 1,413,630 | 182,413 | 592,908 | 42,011 | 57,278 | 1.3634 |
| lz-171 | 2,058,202 | 1,316,282 | 179,912 | 562,008 | 40,644 | 55,355 | 1.3619 |
| lz-172 | 2,122,778 | 1,418,980 | 160,451 | 543,347 | 40,864 | 55,609 | 1.3608 |
| lz-173 | 2,187,093 | 1,390,978 | 183,829 | 612,286 | 41,862 | 57,067 | 1.3632 |
| lz-174 | 2,171,658 | 1,311,138 | 201,657 | 658,863 | 41,713 | 56,770 | 1.3610 |
| lz-175 | 2,126,981 | 1,329,711 | 160,120 | 637,150 | 40,992 | 55,874 | 1.3630 |
| lz-176 | 1,928,289 | 1,249,056 | 149,093 | 530,140 | 39,391 | 53,663 | 1.3623 |
| lz-177 | 2,129,176 | 1,588,823 | 97,200  | 443,153 | 41,195 | 56,220 | 1.3647 |
| lz-178 | 2,165,321 | 1,364,345 | 196,127 | 604,849 | 41,572 | 56,797 | 1.3662 |
| lz-179 | 2,141,023 | 1,352,898 | 456,763 | 331,362 | 41,123 | 55,956 | 1.3607 |
| lz-18  | 2,100,623 | 1,347,039 | 184,661 | 568,923 | 40,089 | 54,943 | 1.3705 |
| lz-180 | 2,141,576 | 1,479,691 | 147,536 | 514,349 | 41,389 | 56,471 | 1.3644 |
| lz-181 | 2,104,253 | 1,362,439 | 141,522 | 600,292 | 40,998 | 55,688 | 1.3583 |
| lz-182 | 2,103,291 | 1,442,362 | 131,016 | 529,913 | 40,930 | 55,969 | 1.3674 |
| lz-183 | 2,107,339 | 1,315,572 | 160,334 | 631,433 | 40,933 | 55,595 | 1.3582 |
| lz-184 | 2,118,470 | 1,362,191 | 162,466 | 593,813 | 40,991 | 55,769 | 1.3605 |
| lz-185 | 2,141,672 | 1,390,651 | 150,724 | 600,297 | 41,278 | 56,157 | 1.3605 |
| lz-186 | 2,130,477 | 1,266,979 | 169,329 | 694,169 | 41,178 | 56,073 | 1.3617 |
| lz-187 | 2,155,910 | 1,575,719 | 135,317 | 444,874 | 41,558 | 56,650 | 1.3632 |
| lz-188 | 2,151,090 | 1,286,111 | 199,990 | 664,989 | 41,380 | 56,420 | 1.3635 |

|        |           |           |         |         |        |        |        |
|--------|-----------|-----------|---------|---------|--------|--------|--------|
| lz-189 | 2,164,297 | 1,351,179 | 184,101 | 629,017 | 41,610 | 56,777 | 1.3645 |
| lz-19  | 2,156,397 | 1,246,184 | 217,184 | 693,029 | 41,388 | 56,408 | 1.3629 |
| lz-190 | 2,164,584 | 1,377,105 | 185,724 | 601,755 | 41,507 | 56,658 | 1.3650 |
| lz-191 | 2,176,403 | 1,273,683 | 204,841 | 697,879 | 41,704 | 56,832 | 1.3627 |
| lz-192 | 2,157,696 | 1,300,559 | 202,142 | 654,995 | 41,416 | 56,546 | 1.3653 |
| lz-193 | 2,164,500 | 1,346,138 | 234,224 | 584,138 | 41,661 | 56,786 | 1.3630 |
| lz-194 | 1,924,389 | 1,046,612 | 150,502 | 727,275 | 39,538 | 52,309 | 1.3230 |
| lz-195 | 2,097,011 | 1,100,655 | 201,127 | 795,229 | 40,429 | 55,081 | 1.3624 |
| lz-196 | 2,121,084 | 1,272,350 | 180,027 | 668,707 | 40,872 | 55,626 | 1.3610 |
| lz-197 | 2,102,089 | 1,069,446 | 178,327 | 854,316 | 40,847 | 55,264 | 1.3530 |
| lz-198 | 2,111,709 | 1,266,826 | 180,545 | 664,338 | 40,619 | 55,412 | 1.3642 |
| lz-199 | 1,848,317 | 992,519   | 107,963 | 747,835 | 38,386 | 49,940 | 1.3010 |
| lz-2   | 2,144,689 | 1,372,783 | 178,381 | 593,525 | 40,934 | 55,909 | 1.3658 |
| lz-20  | 2,118,844 | 1,290,344 | 194,597 | 633,903 | 41,083 | 56,009 | 1.3633 |
| lz-200 | 2,164,324 | 1,643,838 | 131,428 | 389,058 | 41,592 | 56,708 | 1.3634 |
| lz-201 | 2,083,483 | 1,301,153 | 132,070 | 650,260 | 40,664 | 55,085 | 1.3546 |
| lz-202 | 2,069,878 | 1,588,739 | 112,244 | 368,895 | 40,353 | 54,905 | 1.3606 |
| lz-203 | 2,096,054 | 1,177,585 | 205,200 | 713,269 | 40,908 | 55,632 | 1.3599 |
| lz-204 | 2,164,658 | 1,267,567 | 203,455 | 693,636 | 41,504 | 56,647 | 1.3649 |
| lz-205 | 2,178,391 | 1,214,944 | 211,508 | 751,939 | 41,728 | 56,790 | 1.3610 |
| lz-206 | 2,149,696 | 1,180,586 | 214,774 | 754,336 | 41,308 | 56,252 | 1.3618 |
| lz-207 | 2,179,268 | 1,228,009 | 212,858 | 738,401 | 41,753 | 56,880 | 1.3623 |
| lz-208 | 2,159,377 | 1,265,629 | 200,969 | 692,779 | 41,458 | 56,521 | 1.3633 |
| lz-209 | 2,167,051 | 1,200,006 | 205,232 | 761,813 | 41,609 | 56,596 | 1.3602 |
| lz-21  | 2,144,608 | 1,221,857 | 221,094 | 701,657 | 41,202 | 56,153 | 1.3629 |
| lz-210 | 2,181,906 | 1,184,063 | 226,805 | 771,038 | 41,733 | 56,830 | 1.3618 |
| lz-211 | 2,183,894 | 1,234,585 | 216,214 | 733,095 | 41,778 | 56,975 | 1.3638 |
| lz-212 | 2,163,222 | 1,242,566 | 195,717 | 724,939 | 41,558 | 56,565 | 1.3611 |
| lz-213 | 2,149,665 | 1,174,107 | 218,943 | 756,615 | 41,489 | 56,510 | 1.3620 |
| lz-214 | 2,168,468 | 1,191,539 | 217,630 | 759,299 | 41,618 | 56,671 | 1.3617 |
| lz-215 | 2,167,506 | 1,233,087 | 203,097 | 731,322 | 41,572 | 56,721 | 1.3644 |
| lz-216 | 2,171,011 | 1,267,482 | 192,804 | 710,725 | 41,609 | 56,691 | 1.3625 |
| lz-217 | 2,175,809 | 1,213,386 | 212,044 | 750,379 | 41,672 | 56,777 | 1.3625 |
| lz-218 | 2,162,130 | 1,224,073 | 212,191 | 725,866 | 41,608 | 56,687 | 1.3624 |
| lz-219 | 2,167,628 | 1,212,156 | 202,107 | 753,365 | 41,662 | 56,732 | 1.3617 |
| lz-22  | 2,098,569 | 1,234,346 | 207,809 | 656,414 | 40,576 | 55,415 | 1.3657 |
| lz-23  | 2,172,641 | 1,359,847 | 181,291 | 631,503 | 41,632 | 56,899 | 1.3667 |
| lz-24  | 2,108,216 | 1,265,367 | 201,707 | 641,142 | 40,538 | 55,383 | 1.3662 |
| lz-25  | 2,155,582 | 1,376,322 | 190,186 | 589,074 | 41,384 | 56,360 | 1.3619 |
| lz-26  | 2,100,199 | 1,403,501 | 169,115 | 527,583 | 40,475 | 55,332 | 1.3671 |
| lz-27  | 2,087,094 | 1,583,840 | 138,680 | 364,574 | 41,243 | 56,333 | 1.3659 |
| lz-28  | 2,053,683 | 1,272,739 | 191,968 | 588,976 | 39,846 | 54,442 | 1.3663 |
| lz-29  | 2,110,844 | 1,454,138 | 161,981 | 494,725 | 40,579 | 55,301 | 1.3628 |
| lz-3   | 2,160,127 | 1,676,292 | 109,305 | 374,530 | 41,270 | 56,413 | 1.3669 |
| lz-30  | 2,149,399 | 1,438,155 | 168,150 | 543,094 | 41,056 | 56,275 | 1.3707 |
| lz-32  | 2,075,407 | 1,389,917 | 164,381 | 521,109 | 40,284 | 55,093 | 1.3676 |
| lz-33  | 2,166,486 | 1,402,898 | 165,939 | 597,649 | 41,428 | 56,455 | 1.3627 |
| lz-34  | 2,146,306 | 1,548,108 | 138,456 | 459,742 | 40,696 | 55,937 | 1.3745 |
| lz-35  | 2,108,782 | 1,449,115 | 151,750 | 507,917 | 40,471 | 55,335 | 1.3673 |
| lz-36  | 2,167,108 | 1,310,876 | 192,745 | 663,487 | 41,476 | 56,693 | 1.3669 |
| lz-37  | 2,107,556 | 1,415,699 | 164,994 | 526,863 | 40,423 | 55,219 | 1.3660 |

|       |           |           |         |         |        |        |        |
|-------|-----------|-----------|---------|---------|--------|--------|--------|
| lz-38 | 2,143,986 | 1,316,248 | 196,131 | 631,607 | 41,121 | 56,175 | 1.3661 |
| lz-39 | 2,143,293 | 1,276,446 | 192,031 | 674,816 | 41,277 | 56,341 | 1.3649 |
| lz-4  | 2,144,332 | 1,524,823 | 139,595 | 479,914 | 41,120 | 56,106 | 1.3644 |
| lz-40 | 2,133,292 | 1,622,234 | 43,054  | 468,004 | 40,989 | 56,072 | 1.3680 |
| lz-41 | 2,001,769 | 1,274,233 | 171,432 | 556,104 | 39,457 | 54,093 | 1.3709 |
| lz-42 | 2,126,832 | 1,355,851 | 236,080 | 534,901 | 40,583 | 55,637 | 1.3709 |
| lz-43 | 2,118,410 | 1,312,200 | 194,217 | 611,993 | 40,574 | 55,323 | 1.3635 |
| lz-44 | 2,150,658 | 1,467,457 | 162,807 | 520,394 | 41,133 | 56,232 | 1.3671 |
| lz-45 | 2,140,419 | 1,219,092 | 331,284 | 590,043 | 40,858 | 55,903 | 1.3682 |
| lz-46 | 2,113,498 | 1,260,431 | 198,381 | 654,686 | 41,069 | 56,035 | 1.3644 |
| lz-47 | 2,005,329 | 1,330,285 | 158,469 | 516,575 | 39,494 | 54,048 | 1.3685 |
| lz-48 | 2,112,548 | 1,489,546 | 146,181 | 476,821 | 40,448 | 55,212 | 1.3650 |
| lz-49 | 2,120,243 | 1,460,077 | 152,367 | 507,799 | 40,835 | 55,670 | 1.3633 |
| lz-5  | 2,124,779 | 1,371,362 | 169,515 | 583,902 | 40,619 | 55,713 | 1.3716 |
| lz-50 | 2,103,302 | 1,248,995 | 193,196 | 661,111 | 40,751 | 55,490 | 1.3617 |
| lz-51 | 2,087,782 | 1,369,753 | 160,251 | 557,778 | 40,342 | 55,105 | 1.3659 |
| lz-52 | 2,131,196 | 1,265,037 | 195,152 | 671,007 | 41,085 | 56,023 | 1.3636 |
| lz-53 | 2,160,892 | 1,273,281 | 205,640 | 681,971 | 41,365 | 56,485 | 1.3655 |
| lz-54 | 2,159,803 | 1,408,630 | 189,676 | 561,497 | 41,415 | 56,483 | 1.3638 |
| lz-55 | 2,165,248 | 1,317,921 | 192,492 | 654,835 | 41,820 | 57,013 | 1.3633 |
| lz-56 | 2,157,369 | 1,640,793 | 123,299 | 393,277 | 41,395 | 56,361 | 1.3615 |
| lz-57 | 2,134,076 | 1,583,390 | 122,282 | 428,404 | 40,831 | 55,860 | 1.3681 |
| lz-58 | 2,152,024 | 1,530,657 | 149,522 | 471,845 | 41,249 | 56,231 | 1.3632 |
| lz-59 | 2,139,352 | 1,409,276 | 181,620 | 548,456 | 40,970 | 55,996 | 1.3668 |
| lz-6  | 2,128,960 | 1,739,916 | 104,854 | 284,190 | 41,306 | 56,299 | 1.3630 |
| lz-60 | 2,139,549 | 1,514,076 | 156,735 | 468,738 | 40,866 | 55,922 | 1.3684 |
| lz-61 | 2,096,140 | 1,502,472 | 132,925 | 460,743 | 40,245 | 55,117 | 1.3695 |
| lz-62 | 2,111,466 | 1,403,884 | 165,669 | 541,913 | 40,455 | 55,225 | 1.3651 |
| lz-63 | 2,158,287 | 1,496,211 | 155,826 | 506,250 | 41,414 | 56,435 | 1.3627 |
| lz-64 | 2,144,031 | 1,444,128 | 155,321 | 544,582 | 40,982 | 55,898 | 1.3640 |
| lz-65 | 2,138,532 | 1,450,287 | 160,915 | 527,330 | 40,942 | 55,956 | 1.3667 |
| lz-66 | 2,167,956 | 1,459,745 | 168,943 | 539,268 | 41,510 | 56,656 | 1.3649 |
| lz-67 | 2,162,616 | 1,572,227 | 144,325 | 446,064 | 41,480 | 56,504 | 1.3622 |
| lz-68 | 2,148,995 | 1,298,498 | 190,543 | 659,954 | 41,316 | 56,368 | 1.3643 |
| lz-69 | 2,140,097 | 1,458,838 | 165,431 | 515,828 | 41,100 | 56,207 | 1.3676 |
| lz-7  | 2,141,808 | 1,328,505 | 194,776 | 618,527 | 41,397 | 56,391 | 1.3622 |
| lz-70 | 2,160,021 | 1,383,731 | 170,172 | 606,118 | 41,549 | 56,448 | 1.3586 |
| lz-71 | 2,174,786 | 1,442,523 | 164,256 | 568,007 | 41,657 | 56,713 | 1.3614 |
| lz-72 | 2,159,193 | 1,402,968 | 175,930 | 580,295 | 41,486 | 56,515 | 1.3623 |
| lz-73 | 2,064,396 | 955,179   | 865,492 | 243,725 | 39,953 | 54,350 | 1.3603 |
| lz-74 | 2,158,231 | 1,501,011 | 153,733 | 503,487 | 41,631 | 56,663 | 1.3611 |
| lz-75 | 2,107,689 | 1,706,979 | 105,225 | 295,485 | 40,844 | 55,705 | 1.3638 |
| lz-76 | 2,174,080 | 2,107,792 | 25,822  | 40,466  | 41,780 | 57,023 | 1.3648 |
| lz-77 | 2,179,615 | 1,696,303 | 115,415 | 367,897 | 41,860 | 57,123 | 1.3646 |
| lz-78 | 2,149,041 | 1,680,416 | 116,534 | 352,091 | 41,365 | 56,501 | 1.3659 |
| lz-79 | 2,110,273 | 1,787,824 | 77,500  | 244,949 | 40,755 | 55,844 | 1.3702 |
| lz-8  | 2,142,128 | 1,298,711 | 190,211 | 653,206 | 41,268 | 56,254 | 1.3631 |
| lz-80 | 1,995,271 | 1,465,536 | 168,798 | 360,937 | 39,933 | 54,482 | 1.3643 |
| lz-81 | 2,119,250 | 1,208,553 | 663,971 | 246,726 | 40,959 | 55,693 | 1.3597 |
| lz-82 | 2,143,357 | 1,776,490 | 79,099  | 287,768 | 41,333 | 56,570 | 1.3686 |
| lz-83 | 2,143,760 | 1,524,697 | 136,340 | 482,723 | 41,412 | 56,303 | 1.3596 |

|       |           |           |         |         |        |        |        |
|-------|-----------|-----------|---------|---------|--------|--------|--------|
| lz-84 | 2,134,048 | 1,384,906 | 165,296 | 583,846 | 41,255 | 56,179 | 1.3618 |
| lz-85 | 2,180,450 | 1,439,269 | 148,911 | 592,270 | 41,728 | 56,905 | 1.3637 |
| lz-86 | 2,131,006 | 1,320,454 | 140,373 | 670,179 | 41,219 | 55,933 | 1.3570 |
| lz-87 | 2,167,592 | 1,392,102 | 183,278 | 592,212 | 41,780 | 57,024 | 1.3649 |
| lz-88 | 2,188,685 | 1,308,373 | 213,535 | 666,777 | 41,874 | 57,070 | 1.3629 |
| lz-89 | 2,153,718 | 1,564,916 | 141,671 | 447,131 | 41,381 | 56,510 | 1.3656 |
| lz-9  | 2,154,723 | 1,360,444 | 184,684 | 609,595 | 41,452 | 56,576 | 1.3649 |
| lz-90 | 2,178,150 | 1,394,784 | 183,330 | 600,036 | 41,774 | 57,020 | 1.3650 |
| lz-91 | 2,136,774 | 1,287,744 | 207,200 | 641,830 | 41,040 | 55,997 | 1.3644 |
| lz-92 | 2,187,752 | 1,378,446 | 190,070 | 619,236 | 41,936 | 57,286 | 1.3660 |
| lz-93 | 2,168,954 | 1,307,052 | 204,769 | 657,133 | 41,715 | 56,857 | 1.3630 |
| lz-94 | 2,150,239 | 1,376,128 | 179,375 | 594,736 | 41,376 | 56,529 | 1.3662 |
| lz-95 | 2,179,948 | 1,265,719 | 209,802 | 704,427 | 41,859 | 57,004 | 1.3618 |
| lz-96 | 2,164,141 | 1,323,155 | 155,316 | 685,670 | 41,583 | 56,513 | 1.3590 |
| lz-97 | 2,186,711 | 1,521,424 | 156,626 | 508,661 | 41,859 | 57,127 | 1.3647 |
| lz-98 | 2,138,922 | 1,366,137 | 176,237 | 596,548 | 41,316 | 56,348 | 1.3638 |
| lz-99 | 2,130,166 | 1,477,342 | 121,441 | 531,383 | 41,242 | 55,987 | 1.3575 |

---

**Table S7 Summary of assemblies for mungbean pan genome.**

| Assembly | Total length | # contigs | Largest contig | GC (%) | N50 (bp) | N75   | L50    | L75     | # N's per 100 kb | non-reference and non-contamination(bp) |
|----------|--------------|-----------|----------------|--------|----------|-------|--------|---------|------------------|-----------------------------------------|
| lz-1     | 382,334,782  | 234,554   | 342,934        | 33.55  | 1,916    | 1,188 | 60,635 | 121,414 | 38.61            | 20,379,488                              |
| lz-10    | 401,201,276  | 167,468   | 368,279        | 33.67  | 3,277    | 1,854 | 35,951 | 75,800  | 26.59            | 14,033,038                              |
| lz-100   | 410,215,212  | 139,946   | 249,720        | 33.39  | 4,225    | 2,367 | 29,050 | 61,016  | 29.35            | 12,295,315                              |
| lz-101   | 379,814,146  | 223,971   | 231,857        | 33.84  | 2,036    | 1,219 | 55,055 | 112,694 | 151.59           | 23,025,387                              |
| lz-102   | 403,651,119  | 142,810   | 279,688        | 33.37  | 4,019    | 2,262 | 29,920 | 62,907  | 48.81            | 11,814,876                              |
| lz-103   | 392,618,771  | 185,307   | 167,286        | 33.59  | 2,775    | 1,611 | 42,595 | 87,831  | 49.64            | 15,261,559                              |
| lz-104   | 412,562,059  | 148,899   | 394,848        | 33.82  | 3,930    | 2,217 | 31,435 | 65,762  | 37.61            | 14,534,156                              |
| lz-105   | 416,831,818  | 155,186   | 388,613        | 33.64  | 3,810    | 2,154 | 32,901 | 68,471  | 37.06            | 20,685,502                              |
| lz-106   | 406,641,627  | 167,043   | 336,029        | 33.42  | 3,361    | 1,898 | 36,022 | 75,356  | 39.84            | 14,820,378                              |
| lz-107   | 412,321,862  | 132,093   | 293,875        | 33.42  | 4,571    | 2,548 | 27,205 | 56,998  | 31.03            | 12,077,446                              |
| lz-108   | 362,294,866  | 243,996   | 402,011        | 34.26  | 1,653    | 1,032 | 63,828 | 128,911 | 51.45            | 26,752,125                              |
| lz-109   | 399,457,104  | 172,803   | 392,596        | 33.43  | 3,102    | 1,795 | 39,122 | 80,631  | 44.78            | 13,301,922                              |
| lz-11    | 393,360,832  | 184,153   | 401,697        | 33.55  | 2,791    | 1,617 | 41,764 | 86,952  | 30.11            | 15,725,351                              |
| lz-110   | 399,033,375  | 185,997   | 205,986        | 33.50  | 2,800    | 1,643 | 43,266 | 88,682  | 48.47            | 11,334,220                              |
| lz-111   | 398,286,063  | 175,948   | 402,658        | 33.56  | 3,027    | 1,744 | 39,688 | 82,003  | 52.07            | 14,625,587                              |
| lz-112   | 408,449,205  | 146,979   | 393,197        | 33.36  | 3,913    | 2,231 | 31,591 | 65,597  | 38.70            | 9,299,389                               |
| lz-113   | 417,516,252  | 103,291   | 383,915        | 33.29  | 6,274    | 3,419 | 19,773 | 42,081  | 27.86            | 10,276,594                              |
| lz-114   | 395,170,868  | 180,917   | 352,420        | 33.65  | 2,885    | 1,663 | 40,830 | 84,841  | 24.34            | 15,313,826                              |
| lz-115   | 407,408,192  | 163,458   | 406,115        | 33.48  | 3,420    | 1,963 | 36,033 | 74,571  | 40.70            | 9,194,037                               |
| lz-116   | 408,556,049  | 146,256   | 401,718        | 33.43  | 3,964    | 2,233 | 31,047 | 64,826  | 40.22            | 8,417,299                               |
| lz-117   | 409,835,907  | 154,562   | 246,508        | 33.39  | 3,681    | 2,115 | 33,824 | 69,860  | 37.92            | 12,652,268                              |
| lz-118   | 389,981,073  | 206,606   | 191,692        | 33.56  | 2,374    | 1,395 | 48,895 | 100,643 | 48.56            | 16,414,490                              |
| lz-119   | 391,096,219  | 204,630   | 247,806        | 33.83  | 2,418    | 1,409 | 47,744 | 98,826  | 48.38            | 19,599,565                              |
| lz-12    | 381,964,860  | 216,543   | 392,178        | 33.70  | 2,141    | 1,290 | 53,051 | 108,429 | 32.60            | 19,864,632                              |
| lz-120   | 396,748,135  | 197,037   | 399,995        | 33.64  | 2,595    | 1,506 | 45,567 | 94,293  | 44.99            | 14,455,380                              |
| lz-121   | 388,541,212  | 212,737   | 289,501        | 34.50  | 2,268    | 1,326 | 50,086 | 103,681 | 42.78            | 22,541,217                              |
| lz-122   | 411,432,454  | 141,933   | 403,941        | 33.35  | 4,136    | 2,335 | 29,988 | 62,596  | 38.96            | 9,072,669                               |
| lz-123   | 394,930,758  | 194,815   | 401,857        | 33.72  | 2,619    | 1,523 | 45,057 | 93,060  | 44.51            | 13,993,061                              |
| lz-124   | 395,974,872  | 190,495   | 294,836        | 33.54  | 2,699    | 1,573 | 43,857 | 90,736  | 43.45            | 14,656,678                              |
| lz-125   | 398,206,068  | 189,819   | 401,309        | 33.52  | 2,726    | 1,590 | 43,758 | 90,362  | 41.08            | 15,996,236                              |
| lz-126   | 398,710,640  | 178,794   | 402,252        | 33.52  | 2,959    | 1,713 | 40,515 | 83,751  | 35.09            | 14,616,051                              |
| lz-127   | 397,346,223  | 196,529   | 401,948        | 33.62  | 2,616    | 1,513 | 44,961 | 93,333  | 39.24            | 17,958,632                              |
| lz-128   | 375,816,011  | 221,810   | 402,142        | 34.07  | 2,039    | 1,202 | 53,282 | 110,625 | 57.42            | 22,039,419                              |
| lz-129   | 369,047,704  | 214,780   | 368,116        | 34.18  | 2,081    | 1,229 | 51,958 | 106,874 | 42.54            | 23,447,022                              |
| lz-13    | 393,370,922  | 191,199   | 393,385        | 33.60  | 2,669    | 1,549 | 43,931 | 91,037  | 33.97            | 16,885,603                              |
| lz-130   | 382,178,245  | 228,136   | 229,031        | 33.74  | 1,993    | 1,211 | 57,184 | 115,982 | 54.44            | 21,176,472                              |
| lz-131   | 395,521,050  | 179,367   | 185,340        | 33.67  | 2,937    | 1,680 | 39,927 | 83,397  | 35.47            | 15,156,947                              |
| lz-132   | 394,704,367  | 191,024   | 285,542        | 33.51  | 2,678    | 1,563 | 44,425 | 91,391  | 49.94            | 16,105,870                              |
| lz-133   | 409,780,384  | 142,674   | 372,019        | 33.40  | 4,113    | 2,306 | 29,776 | 62,565  | 25.84            | 12,852,879                              |
| lz-134   | 404,425,124  | 166,813   | 402,077        | 33.38  | 3,302    | 1,891 | 37,013 | 76,674  | 41.14            | 14,381,363                              |
| lz-135   | 409,804,566  | 152,791   | 401,642        | 33.38  | 3,744    | 2,132 | 33,054 | 68,702  | 32.70            | 13,543,993                              |
| lz-136   | 403,337,512  | 161,195   | 404,036        | 33.55  | 3,478    | 1,942 | 34,124 | 72,197  | 37.60            | 12,725,775                              |
| lz-137   | 380,657,324  | 227,744   | 324,425        | 34.09  | 1,988    | 1,191 | 55,605 | 114,665 | 46.14            | 22,106,827                              |
| lz-138   | 400,527,584  | 159,538   | 306,945        | 33.58  | 3,522    | 1,943 | 33,313 | 70,897  | 36.50            | 14,606,155                              |
| lz-14    | 394,969,119  | 188,355   | 353,317        | 33.52  | 2,713    | 1,591 | 43,518 | 89,952  | 25.83            | 15,569,559                              |

|        |             |         |         |       |       |       |        |         |       |            |
|--------|-------------|---------|---------|-------|-------|-------|--------|---------|-------|------------|
| lz-140 | 394,406,017 | 182,777 | 383,819 | 33.68 | 2,851 | 1,643 | 41,400 | 85,809  | 39.39 | 15,576,729 |
| lz-141 | 403,079,650 | 165,472 | 332,506 | 33.49 | 3,403 | 1,887 | 34,776 | 73,630  | 41.45 | 15,835,618 |
| lz-142 | 394,390,168 | 181,336 | 164,623 | 33.53 | 2,871 | 1,661 | 41,256 | 85,316  | 53.87 | 15,556,118 |
| lz-143 | 403,772,240 | 162,687 | 261,088 | 33.51 | 3,392 | 1,953 | 36,028 | 74,422  | 41.99 | 13,966,207 |
| lz-144 | 415,671,523 | 118,216 | 228,905 | 33.35 | 5,328 | 2,903 | 23,127 | 49,261  | 26.62 | 11,346,691 |
| lz-145 | 410,726,348 | 134,635 | 233,379 | 33.43 | 4,448 | 2,474 | 27,235 | 57,711  | 30.52 | 12,187,215 |
| lz-146 | 410,559,594 | 135,511 | 370,706 | 33.37 | 4,419 | 2,441 | 27,615 | 58,490  | 32.68 | 11,029,457 |
| lz-147 | 383,706,838 | 223,486 | 381,787 | 33.90 | 2,071 | 1,225 | 53,700 | 111,254 | 39.13 | 22,285,989 |
| lz-148 | 403,412,342 | 168,367 | 394,434 | 33.39 | 3,229 | 1,870 | 37,848 | 78,098  | 33.12 | 12,863,429 |
| lz-149 | 382,237,916 | 197,990 | 198,945 | 34.27 | 2,476 | 1,413 | 45,003 | 94,137  | 47.68 | 18,306,291 |
| lz-15  | 394,933,080 | 182,666 | 280,465 | 33.46 | 2,823 | 1,651 | 41,987 | 86,724  | 29.22 | 15,522,938 |
| lz-150 | 409,300,828 | 140,553 | 207,850 | 33.45 | 4,202 | 2,341 | 29,216 | 61,350  | 35.29 | 12,806,954 |
| lz-151 | 399,486,902 | 165,811 | 329,843 | 33.51 | 3,287 | 1,868 | 35,885 | 75,351  | 34.85 | 14,375,530 |
| lz-152 | 406,442,533 | 146,802 | 260,926 | 33.67 | 3,955 | 2,210 | 30,797 | 64,554  | 32.09 | 13,542,963 |
| lz-153 | 411,031,262 | 128,315 | 257,073 | 33.57 | 4,938 | 2,616 | 24,296 | 52,555  | 27.31 | 13,739,426 |
| lz-154 | 405,243,367 | 155,798 | 381,035 | 33.46 | 3,632 | 2,043 | 33,072 | 69,643  | 30.02 | 12,347,773 |
| lz-155 | 388,314,418 | 212,061 | 124,611 | 33.76 | 2,261 | 1,354 | 51,598 | 105,144 | 26.04 | 19,163,547 |
| lz-156 | 383,265,209 | 200,450 | 403,371 | 33.89 | 2,456 | 1,384 | 44,751 | 94,629  | 50.25 | 19,280,489 |
| lz-157 | 328,747,445 | 251,931 | 348,770 | 34.97 | 1,307 | 858   | 70,859 | 140,636 | 47.08 | 36,540,165 |
| lz-158 | 404,052,427 | 165,162 | 403,350 | 33.57 | 3,360 | 1,900 | 35,858 | 75,001  | 41.36 | 14,649,979 |
| lz-159 | 392,718,545 | 205,415 | 401,803 | 33.57 | 2,402 | 1,427 | 49,194 | 100,586 | 43.91 | 15,887,770 |
| lz-16  | 397,130,528 | 171,379 | 401,734 | 33.44 | 3,083 | 1,793 | 38,672 | 80,168  | 14.50 | 13,038,333 |
| lz-160 | 408,196,572 | 167,128 | 248,384 | 33.43 | 3,329 | 1,911 | 37,023 | 76,708  | 35.20 | 13,208,788 |
| lz-161 | 410,907,688 | 143,411 | 151,508 | 33.46 | 4,135 | 2,296 | 29,565 | 62,323  | 38.74 | 10,475,779 |
| lz-162 | 406,506,461 | 154,891 | 402,698 | 33.37 | 3,662 | 2,069 | 33,265 | 69,542  | 38.13 | 12,481,189 |
| lz-163 | 377,045,125 | 237,232 | 305,767 | 34.01 | 1,842 | 1,127 | 60,184 | 122,307 | 48.67 | 24,178,993 |
| lz-164 | 401,807,961 | 150,678 | 353,718 | 33.55 | 3,778 | 2,095 | 31,243 | 66,353  | 30.32 | 13,941,774 |
| lz-165 | 391,046,366 | 200,021 | 380,782 | 33.73 | 2,498 | 1,452 | 46,547 | 96,376  | 36.11 | 14,950,877 |
| lz-166 | 377,229,488 | 196,363 | 284,801 | 34.29 | 2,484 | 1,391 | 43,576 | 92,290  | 32.15 | 20,903,671 |
| lz-167 | 394,114,986 | 179,433 | 369,754 | 33.77 | 2,924 | 1,675 | 40,283 | 83,729  | 42.15 | 16,138,706 |
| lz-168 | 397,984,108 | 181,382 | 305,278 | 33.50 | 2,899 | 1,678 | 41,337 | 85,440  | 36.13 | 15,298,784 |
| lz-169 | 407,538,707 | 139,100 | 287,785 | 33.45 | 4,272 | 2,354 | 28,350 | 60,072  | 34.28 | 12,437,821 |
| lz-17  | 410,157,173 | 127,137 | 406,612 | 33.54 | 4,815 | 2,647 | 25,291 | 53,601  | 46.92 | 11,950,640 |
| lz-170 | 414,326,042 | 107,716 | 402,504 | 33.46 | 6,126 | 3,237 | 19,792 | 42,796  | 31.38 | 10,617,818 |
| lz-171 | 358,454,002 | 238,586 | 353,257 | 35.32 | 1,671 | 1,017 | 59,993 | 123,955 | 33.94 | 30,036,917 |
| lz-172 | 388,538,558 | 221,024 | 217,190 | 33.57 | 2,132 | 1,289 | 54,701 | 111,229 | 41.37 | 19,143,841 |
| lz-173 | 412,551,172 | 129,868 | 349,960 | 33.34 | 4,661 | 2,592 | 26,361 | 55,651  | 28.97 | 11,216,128 |
| lz-174 | 412,602,299 | 133,135 | 291,615 | 33.34 | 4,550 | 2,513 | 27,005 | 57,137  | 35.06 | 12,754,053 |
| lz-175 | 399,836,576 | 179,222 | 185,568 | 33.45 | 2,951 | 1,722 | 41,120 | 84,448  | 47.90 | 15,590,890 |
| lz-176 | 316,149,581 | 243,291 | 275,458 | 35.47 | 1,292 | 848   | 68,484 | 135,945 | 48.82 | 36,243,331 |
| lz-177 | 397,388,686 | 180,226 | 323,989 | 33.57 | 2,929 | 1,684 | 40,617 | 84,346  | 44.55 | 13,300,679 |
| lz-178 | 409,554,981 | 130,559 | 208,941 | 33.43 | 4,672 | 2,551 | 25,941 | 55,230  | 32.97 | 11,911,330 |
| lz-179 | 406,493,503 | 191,913 | 191,364 | 33.66 | 2,826 | 1,582 | 41,954 | 88,479  | 40.46 | 17,075,099 |
| lz-18  | 370,438,531 | 238,621 | 353,867 | 33.69 | 1,779 | 1,105 | 61,594 | 124,593 | 24.42 | 22,156,904 |
| lz-180 | 397,298,793 | 183,479 | 363,195 | 33.68 | 2,856 | 1,648 | 41,343 | 85,996  | 34.52 | 14,408,648 |
| lz-181 | 399,122,888 | 190,423 | 401,886 | 34.00 | 2,786 | 1,570 | 42,202 | 88,517  | 48.48 | 18,341,219 |
| lz-182 | 382,147,119 | 215,201 | 274,784 | 34.15 | 2,180 | 1,284 | 51,550 | 106,226 | 47.51 | 19,428,776 |
| lz-183 | 398,434,011 | 178,377 | 402,241 | 33.45 | 2,959 | 1,716 | 40,507 | 83,724  | 42.13 | 16,496,916 |



|        |             |         |         |       |       |       |        |         |       |            |
|--------|-------------|---------|---------|-------|-------|-------|--------|---------|-------|------------|
| lz-184 | 396,813,361 | 171,028 | 249,557 | 33.53 | 3,129 | 1,786 | 37,584 | 78,673  | 37.12 | 15,320,962 |
| lz-185 | 409,892,440 | 158,283 | 296,276 | 33.39 | 3,572 | 2,044 | 34,634 | 71,850  | 33.47 | 14,157,237 |
| lz-186 | 406,077,331 | 152,308 | 280,699 | 33.58 | 3,823 | 2,089 | 30,817 | 66,112  | 28.30 | 16,034,937 |
| lz-187 | 401,293,639 | 161,840 | 213,767 | 33.63 | 3,472 | 1,919 | 33,733 | 71,812  | 35.70 | 12,152,525 |
| lz-188 | 395,091,034 | 183,536 | 392,899 | 33.53 | 2,831 | 1,636 | 41,724 | 86,458  | 44.94 | 15,903,603 |
| lz-189 | 399,192,375 | 175,162 | 234,544 | 33.53 | 3,059 | 1,753 | 38,900 | 81,085  | 34.27 | 14,663,822 |
| lz-19  | 403,027,103 | 166,489 | 347,953 | 33.43 | 3,273 | 1,883 | 36,840 | 76,638  | 27.11 | 14,406,195 |
| lz-190 | 400,924,049 | 166,559 | 167,769 | 33.60 | 3,322 | 1,862 | 35,829 | 75,290  | 32.01 | 14,101,741 |
| lz-191 | 411,157,514 | 134,097 | 384,536 | 33.37 | 4,475 | 2,474 | 27,101 | 57,610  | 32.05 | 12,951,290 |
| lz-192 | 400,898,943 | 156,379 | 349,663 | 33.49 | 3,588 | 1,985 | 32,300 | 69,178  | 28.37 | 14,038,812 |
| lz-193 | 402,631,381 | 153,337 | 360,717 | 33.55 | 3,764 | 2,054 | 31,123 | 66,600  | 33.16 | 13,627,068 |
| lz-194 | 399,829,916 | 134,297 | 174,494 | 34.05 | 4,857 | 2,380 | 22,615 | 51,400  | 37.10 | 37,128,410 |
| lz-195 | 402,412,143 | 165,773 | 404,658 | 33.52 | 3,333 | 1,877 | 35,843 | 75,158  | 38.66 | 18,973,417 |
| lz-196 | 398,333,772 | 174,867 | 335,984 | 33.49 | 3,028 | 1,763 | 39,734 | 81,886  | 47.65 | 16,691,202 |
| lz-197 | 409,278,399 | 139,208 | 293,058 | 33.34 | 4,225 | 2,377 | 29,078 | 60,900  | 45.08 | 18,690,283 |
| lz-198 | 397,402,756 | 183,852 | 293,004 | 33.70 | 2,853 | 1,642 | 41,477 | 86,191  | 44.75 | 19,255,360 |
| lz-199 | 410,312,325 | 137,527 | 261,413 | 33.37 | 4,319 | 2,406 | 28,388 | 59,723  | 40.32 | 41,012,973 |
| lz-2   | 404,435,564 | 170,346 | 177,706 | 33.27 | 3,174 | 1,853 | 38,558 | 79,438  | 33.12 | 13,406,773 |
| lz-20  | 378,567,248 | 204,147 | 331,783 | 33.96 | 2,315 | 1,353 | 47,649 | 99,390  | 24.62 | 18,896,433 |
| lz-200 | 412,626,683 | 125,079 | 287,361 | 33.39 | 4,957 | 2,705 | 24,383 | 52,204  | 41.01 | 9,088,218  |
| lz-201 | 388,656,225 | 195,445 | 401,671 | 33.54 | 2,537 | 1,490 | 45,724 | 94,339  | 42.25 | 16,882,146 |
| lz-202 | 375,645,016 | 223,958 | 295,462 | 33.71 | 1,999 | 1,213 | 56,078 | 113,932 | 55.47 | 18,728,606 |
| lz-203 | 385,689,981 | 188,549 | 203,754 | 33.86 | 2,640 | 1,539 | 43,494 | 89,933  | 41.95 | 18,192,123 |
| lz-204 | 407,268,837 | 141,511 | 241,782 | 33.40 | 4,118 | 2,318 | 29,726 | 62,149  | 36.76 | 13,656,318 |
| lz-205 | 403,521,936 | 108,900 | 174,942 | 33.17 | 6,682 | 3,142 | 16,485 | 38,105  | 35.77 | 14,087,693 |
| lz-206 | 404,300,903 | 145,318 | 328,200 | 33.36 | 3,951 | 2,224 | 30,853 | 64,490  | 38.69 | 13,997,616 |
| lz-207 | 404,113,459 | 107,455 | 68,259  | 33.12 | 6,814 | 3,203 | 16,453 | 37,722  | 36.12 | 13,804,064 |
| lz-208 | 402,730,155 | 150,230 | 306,329 | 33.36 | 3,748 | 2,130 | 32,391 | 67,441  | 39.75 | 13,205,191 |
| lz-209 | 410,057,899 | 130,658 | 371,507 | 33.33 | 4,573 | 2,558 | 27,076 | 56,623  | 31.37 | 13,083,660 |
| lz-21  | 396,383,124 | 183,353 | 261,018 | 33.50 | 2,826 | 1,645 | 41,938 | 86,753  | 26.09 | 16,336,478 |
| lz-210 | 406,535,439 | 107,477 | 96,279  | 33.18 | 6,781 | 3,203 | 16,511 | 38,000  | 31.43 | 14,025,538 |
| lz-211 | 405,328,455 | 107,245 | 77,162  | 33.18 | 6,815 | 3,204 | 16,218 | 37,577  | 30.99 | 13,835,343 |
| lz-212 | 397,222,723 | 120,257 | 130,226 | 33.16 | 5,671 | 2,720 | 19,291 | 44,062  | 34.79 | 14,467,934 |
| lz-213 | 399,076,139 | 164,087 | 383,716 | 33.60 | 3,350 | 1,887 | 35,210 | 74,138  | 30.53 | 15,693,661 |
| lz-214 | 408,571,532 | 133,473 | 280,971 | 33.31 | 4,428 | 2,493 | 27,900 | 58,216  | 34.51 | 13,234,552 |
| lz-215 | 407,832,373 | 129,161 | 375,753 | 33.32 | 4,643 | 2,572 | 26,260 | 55,417  | 35.50 | 12,312,849 |
| lz-216 | 406,755,092 | 136,540 | 392,623 | 33.30 | 4,303 | 2,402 | 28,221 | 59,397  | 35.08 | 11,981,210 |
| lz-217 | 403,402,922 | 115,126 | 225,595 | 33.15 | 6,137 | 2,928 | 18,025 | 41,446  | 35.62 | 14,402,331 |
| lz-218 | 402,257,456 | 165,450 | 196,694 | 33.39 | 3,306 | 1,903 | 36,862 | 76,193  | 33.16 | 14,857,686 |
| lz-219 | 402,540,681 | 115,360 | 180,638 | 33.14 | 6,194 | 2,906 | 17,681 | 40,986  | 35.29 | 14,723,164 |
| lz-22  | 386,077,362 | 208,689 | 207,477 | 33.69 | 2,297 | 1,365 | 49,880 | 102,662 | 32.03 | 18,778,104 |
| lz-23  | 414,150,914 | 112,338 | 204,995 | 33.41 | 5,675 | 3,082 | 21,690 | 46,191  | 50.30 | 10,772,515 |
| lz-24  | 390,047,165 | 206,952 | 222,336 | 33.53 | 2,348 | 1,408 | 50,292 | 102,319 | 30.58 | 17,107,054 |
| lz-25  | 400,637,450 | 165,245 | 206,775 | 33.43 | 3,282 | 1,889 | 36,552 | 76,043  | 25.75 | 13,876,727 |
| lz-26  | 386,318,770 | 228,048 | 214,633 | 33.93 | 2,030 | 1,210 | 55,410 | 114,443 | 34.16 | 20,702,415 |
| lz-27  | 364,491,694 | 218,813 | 402,572 | 34.18 | 1,982 | 1,187 | 54,104 | 110,476 | 39.40 | 19,263,649 |
| lz-28  | 367,331,110 | 237,192 | 200,297 | 33.91 | 1,771 | 1,099 | 61,192 | 123,795 | 28.07 | 23,079,827 |
| lz-29  | 383,177,697 | 222,514 | 288,556 | 33.50 | 2,067 | 1,271 | 56,263 | 113,400 | 25.14 | 16,883,428 |

|       |             |         |         |       |       |       |        |         |        |            |
|-------|-------------|---------|---------|-------|-------|-------|--------|---------|--------|------------|
| lz-3  | 399,547,241 | 123,555 | 207,157 | 33.16 | 5,355 | 2,636 | 20,696 | 46,796  | 39.02  | 9,902,022  |
| lz-30 | 383,654,035 | 141,131 | 131,860 | 33.31 | 4,165 | 2,133 | 26,011 | 57,439  | 22.69  | 13,505,415 |
| lz-32 | 372,719,655 | 232,890 | 257,743 | 33.96 | 1,871 | 1,130 | 58,195 | 119,185 | 31.41  | 21,878,792 |
| lz-33 | 404,392,914 | 162,928 | 385,510 | 33.27 | 3,360 | 1,952 | 36,510 | 75,235  | 24.31  | 12,517,299 |
| lz-34 | 399,526,074 | 206,374 | 221,570 | 33.82 | 2,442 | 1,432 | 48,035 | 99,828  | 27.74  | 16,423,963 |
| lz-35 | 382,243,336 | 237,994 | 293,130 | 34.05 | 1,872 | 1,136 | 59,314 | 121,806 | 32.40  | 22,119,836 |
| lz-36 | 411,830,201 | 111,845 | 395,795 | 33.39 | 5,609 | 3,085 | 22,064 | 46,493  | 60.72  | 10,850,417 |
| lz-37 | 381,049,243 | 233,317 | 308,256 | 33.59 | 1,913 | 1,171 | 58,831 | 119,708 | 34.14  | 20,544,735 |
| lz-38 | 394,825,785 | 189,126 | 298,570 | 33.38 | 2,682 | 1,589 | 44,602 | 91,302  | 24.31  | 15,626,161 |
| lz-39 | 402,378,294 | 162,090 | 402,185 | 34.08 | 3,462 | 1,943 | 34,561 | 72,454  | 74.98  | 15,618,732 |
| lz-4  | 391,642,335 | 135,217 | 159,990 | 33.18 | 4,608 | 2,298 | 23,848 | 53,271  | 29.94  | 12,352,016 |
| lz-40 | 398,177,207 | 144,404 | 407,049 | 33.46 | 3,911 | 2,196 | 30,504 | 63,898  | 68.95  | 4,552,414  |
| lz-41 | 358,443,659 | 208,998 | 266,677 | 34.45 | 2,084 | 1,211 | 48,977 | 102,685 | 109.75 | 21,811,748 |
| lz-42 | 387,318,222 | 219,850 | 278,517 | 33.45 | 2,139 | 1,290 | 54,229 | 110,434 | 26.95  | 18,616,654 |
| lz-43 | 385,867,516 | 218,832 | 403,870 | 33.45 | 2,138 | 1,304 | 54,698 | 110,526 | 29.54  | 18,399,448 |
| lz-44 | 397,713,563 | 195,118 | 402,955 | 33.38 | 2,603 | 1,547 | 46,523 | 94,807  | 27.54  | 14,549,128 |
| lz-45 | 394,018,394 | 206,066 | 280,404 | 33.49 | 2,398 | 1,429 | 49,529 | 101,085 | 22.53  | 17,722,413 |
| lz-46 | 397,556,363 | 171,015 | 403,577 | 34.13 | 3,171 | 1,793 | 37,132 | 77,834  | 64.33  | 15,932,522 |
| lz-47 | 358,255,379 | 218,530 | 401,605 | 34.36 | 1,936 | 1,154 | 53,467 | 110,250 | 111.25 | 22,326,886 |
| lz-48 | 376,576,777 | 239,050 | 157,578 | 33.63 | 1,821 | 1,140 | 62,518 | 124,987 | 28.33  | 18,961,245 |
| lz-49 | 397,701,581 | 157,395 | 402,037 | 33.53 | 3,501 | 1,997 | 34,252 | 71,117  | 92.28  | 11,689,677 |
| lz-5  | 393,308,238 | 198,870 | 297,460 | 33.69 | 2,529 | 1,460 | 45,334 | 94,916  | 30.10  | 17,326,703 |
| lz-50 | 394,923,210 | 159,184 | 234,678 | 33.49 | 3,398 | 1,955 | 35,303 | 72,825  | 85.20  | 13,375,301 |
| lz-51 | 384,391,722 | 191,522 | 354,939 | 33.69 | 2,591 | 1,506 | 44,203 | 91,369  | 101.25 | 16,194,616 |
| lz-52 | 401,358,163 | 145,765 | 373,586 | 33.37 | 3,855 | 2,202 | 31,343 | 65,211  | 67.43  | 12,821,638 |
| lz-53 | 393,319,559 | 184,344 | 288,592 | 33.36 | 2,766 | 1,628 | 43,021 | 88,345  | 19.56  | 15,449,888 |
| lz-54 | 403,161,169 | 161,894 | 195,029 | 33.39 | 3,388 | 1,952 | 35,889 | 74,419  | 24.92  | 12,937,409 |
| lz-55 | 399,940,387 | 142,055 | 348,327 | 33.89 | 4,194 | 2,229 | 27,519 | 59,631  | 22.84  | 14,089,452 |
| lz-56 | 398,802,113 | 179,314 | 229,312 | 33.29 | 2,931 | 1,718 | 41,573 | 85,148  | 23.00  | 10,997,208 |
| lz-57 | 388,236,666 | 219,459 | 392,335 | 33.59 | 2,153 | 1,302 | 54,093 | 110,050 | 25.73  | 16,838,866 |
| lz-58 | 389,758,928 | 139,178 | 171,714 | 33.22 | 4,394 | 2,210 | 24,716 | 55,194  | 21.54  | 12,615,086 |
| lz-59 | 402,932,600 | 171,263 | 213,353 | 33.32 | 3,144 | 1,832 | 38,924 | 80,090  | 25.62  | 12,776,127 |
| lz-6  | 392,479,957 | 178,330 | 294,520 | 33.80 | 2,963 | 1,652 | 38,375 | 81,620  | 26.19  | 11,702,253 |
| lz-60 | 394,334,508 | 209,300 | 401,701 | 33.35 | 2,337 | 1,415 | 51,451 | 104,074 | 28.99  | 15,467,546 |
| lz-61 | 377,959,063 | 244,353 | 291,954 | 33.59 | 1,769 | 1,108 | 64,179 | 128,376 | 39.86  | 20,967,325 |
| lz-62 | 382,993,168 | 239,715 | 161,911 | 33.52 | 1,860 | 1,152 | 62,073 | 124,576 | 43.57  | 21,029,316 |
| lz-63 | 402,338,494 | 169,304 | 279,828 | 33.35 | 3,190 | 1,854 | 38,199 | 78,783  | 28.75  | 11,836,094 |
| lz-64 | 397,918,938 | 197,373 | 260,171 | 33.49 | 2,572 | 1,525 | 46,818 | 95,650  | 26.87  | 16,614,562 |
| lz-65 | 388,036,086 | 215,519 | 393,568 | 33.59 | 2,211 | 1,326 | 52,517 | 107,192 | 25.88  | 18,545,841 |
| lz-66 | 400,316,693 | 178,595 | 303,286 | 33.38 | 2,948 | 1,731 | 41,363 | 84,786  | 22.93  | 12,967,166 |
| lz-67 | 402,385,864 | 121,158 | 204,686 | 33.22 | 5,732 | 2,729 | 19,112 | 44,162  | 27.79  | 11,527,307 |
| lz-68 | 385,587,611 | 135,127 | 310,222 | 33.26 | 4,534 | 2,255 | 23,389 | 52,908  | 24.62  | 14,919,714 |
| lz-69 | 393,512,802 | 204,445 | 160,621 | 33.56 | 2,433 | 1,439 | 48,870 | 99,865  | 39.72  | 16,787,648 |
| lz-7  | 394,697,928 | 172,517 | 379,962 | 33.74 | 3,126 | 1,732 | 36,502 | 77,929  | 28.35  | 15,925,892 |
| lz-70 | 398,556,095 | 125,980 | 164,133 | 33.18 | 5,383 | 2,561 | 20,017 | 46,341  | 25.22  | 13,641,382 |
| lz-71 | 404,075,208 | 118,024 | 76,961  | 33.15 | 5,997 | 2,828 | 18,359 | 42,458  | 25.02  | 12,313,119 |
| lz-72 | 405,136,021 | 154,994 | 303,599 | 33.34 | 3,614 | 2,074 | 33,982 | 70,343  | 30.11  | 12,279,650 |
| lz-73 | 382,955,873 | 224,274 | 293,885 | 33.82 | 2,069 | 1,197 | 52,593 | 110,307 | 33.04  | 24,725,771 |

|       |             |         |         |       |       |       |        |         |       |            |
|-------|-------------|---------|---------|-------|-------|-------|--------|---------|-------|------------|
| lz-74 | 410,213,801 | 147,845 | 396,851 | 33.56 | 3,962 | 2,226 | 30,980 | 64,868  | 41.60 | 11,814,957 |
| lz-75 | 386,011,522 | 217,897 | 402,572 | 34.04 | 2,170 | 1,285 | 52,502 | 107,860 | 57.00 | 16,194,291 |
| lz-76 | 409,450,253 | 142,250 | 296,557 | 33.38 | 4,105 | 2,308 | 29,963 | 62,657  | 40.21 | 4,958,916  |
| lz-77 | 411,040,230 | 137,096 | 379,377 | 33.40 | 4,383 | 2,432 | 28,100 | 59,088  | 36.17 | 9,064,540  |
| lz-78 | 403,302,928 | 159,739 | 402,389 | 33.49 | 3,482 | 1,984 | 34,803 | 72,470  | 32.65 | 10,490,512 |
| lz-79 | 379,861,019 | 220,166 | 369,010 | 33.90 | 2,093 | 1,234 | 52,785 | 109,289 | 51.72 | 17,277,024 |
| lz-8  | 403,573,595 | 141,781 | 402,661 | 33.47 | 4,094 | 2,271 | 29,359 | 62,003  | 55.97 | 12,293,084 |
| lz-80 | 339,060,291 | 228,925 | 240,400 | 35.00 | 1,634 | 991   | 58,037 | 119,538 | 54.84 | 28,449,070 |
| lz-81 | 400,060,388 | 182,303 | 350,988 | 33.48 | 2,998 | 1,650 | 38,569 | 82,159  | 41.43 | 16,332,665 |
| lz-82 | 396,389,553 | 191,368 | 401,937 | 33.57 | 2,680 | 1,568 | 44,396 | 91,336  | 51.83 | 12,119,494 |
| lz-83 | 395,145,727 | 182,559 | 196,125 | 33.70 | 2,851 | 1,658 | 41,849 | 86,143  | 36.69 | 13,821,888 |
| lz-84 | 401,508,068 | 167,295 | 293,792 | 33.48 | 3,250 | 1,873 | 37,224 | 77,090  | 38.21 | 13,713,622 |
| lz-85 | 424,875,772 | 81,080  | 330,983 | 33.23 | 8,582 | 4,623 | 14,680 | 31,376  | 28.23 | 8,998,379  |
| lz-86 | 404,474,806 | 162,820 | 231,560 | 33.60 | 3,460 | 1,927 | 34,267 | 72,529  | 42.34 | 14,782,721 |
| lz-87 | 402,161,222 | 164,501 | 294,694 | 33.59 | 3,367 | 1,928 | 36,035 | 74,545  | 44.04 | 14,633,651 |
| lz-88 | 411,733,364 | 100,860 | 107,811 | 33.10 | 7,838 | 3,563 | 14,222 | 33,411  | 23.59 | 12,907,950 |
| lz-89 | 400,184,139 | 180,727 | 231,551 | 33.45 | 2,938 | 1,700 | 40,930 | 84,662  | 41.63 | 13,491,903 |
| lz-9  | 398,963,636 | 173,041 | 150,146 | 33.45 | 3,087 | 1,780 | 38,616 | 80,352  | 26.51 | 14,026,413 |
| lz-90 | 413,312,513 | 144,094 | 235,669 | 33.57 | 4,162 | 2,308 | 29,562 | 62,390  | 39.14 | 12,129,709 |
| lz-91 | 392,945,861 | 193,296 | 402,913 | 33.56 | 2,617 | 1,534 | 45,004 | 92,695  | 50.32 | 17,189,022 |
| lz-92 | 410,346,684 | 136,773 | 238,241 | 33.45 | 4,485 | 2,438 | 27,037 | 57,557  | 40.93 | 13,100,634 |
| lz-93 | 403,184,938 | 165,749 | 298,896 | 33.48 | 3,369 | 1,879 | 35,331 | 74,533  | 37.27 | 15,014,787 |
| lz-94 | 400,737,735 | 170,934 | 270,028 | 33.43 | 3,141 | 1,821 | 38,573 | 79,631  | 38.47 | 13,466,335 |
| lz-95 | 409,631,144 | 133,510 | 400,119 | 33.41 | 4,445 | 2,501 | 27,530 | 57,851  | 29.73 | 12,892,844 |
| lz-96 | 414,604,111 | 131,769 | 210,303 | 33.32 | 4,590 | 2,577 | 27,405 | 57,141  | 38.02 | 12,152,300 |
| lz-97 | 414,935,582 | 126,043 | 255,994 | 33.32 | 4,895 | 2,706 | 25,306 | 53,440  | 34.96 | 10,533,101 |
| lz-98 | 391,302,611 | 185,816 | 347,067 | 33.68 | 2,767 | 1,599 | 42,431 | 87,563  | 77.11 | 17,223,893 |
| lz-99 | 400,558,469 | 170,009 | 409,601 | 33.41 | 3,185 | 1,824 | 37,697 | 78,386  | 44.11 | 13,205,594 |
| Mean  | 396,561,657 | 172,661 | 300,986 | 33.58 | 3,380 | 1,888 | 38,662 | 80,403  | 39.14 | 15,656,462 |

**Table S8 Description of phenotypic traits for the 217 mungbean accessions.**

| Trait Related      | Trait Name                             | Trait Abbreviation | Type         | Year | Location | Season | Average | Stdev   | Min.    | Max.     | Skewness | Kurtosis | Broad-sense Heritability |
|--------------------|----------------------------------------|--------------------|--------------|------|----------|--------|---------|---------|---------|----------|----------|----------|--------------------------|
| Yield              | Branch number                          | BRN                | Quantitative | 2    | 2        | 2      | 4.14    | 1.22    | 1.20    | 7.70     | 0.28     | 2.73     | 0.61                     |
|                    | Pod length(cm)                         | PDL                | Quantitative | 2    | 2        | 2      | 9.25    | 1.40    | 5.23    | 13.50    | 0.15     | 2.97     | 0.95                     |
|                    | Total number of pod                    | PDTN               | Quantitative | 2    | 2        | 2      | 33.15   | 20.63   | 0.30    | 115.20   | 1.02     | 4.16     | 0.71                     |
|                    | Pod width(mm)                          | PDW                | Quantitative | 2    | 2        | 2      | 4.91    | 0.51    | 3.48    | 6.47     | 0.09     | 2.90     | 0.30                     |
|                    | 100 seed-weight(g)                     | SD100WT            | Quantitative | 2    | 2        | 2      | 5.23    | 1.21    | 1.99    | 8.46     | -0.17    | 2.89     | 0.98                     |
|                    | Number of seeds per pod                | SDNPPD             | Quantitative | 2    | 2        | 2      | 11.30   | 1.12    | 7.90    | 14.35    | -0.26    | 2.98     | 0.79                     |
|                    | Yield per plant(g)                     | YPPL               | Quantitative | 2    | 2        | 2      | 15.48   | 9.85    | 0.14    | 49.35    | 0.96     | 3.73     | 0.63                     |
| Quality            | Crude protein content(g/100g)          | CPC                | Quantitative | 1    | 2        | 1      | 23.92   | 1.34    | 20.50   | 27.80    | 0.30     | 3.01     | 0.58                     |
|                    | Crude starch content(%)                | CSC                | Quantitative | 1    | 2        | 1      | 49.20   | 1.99    | 43.57   | 54.36    | -0.13    | 2.95     | 0.89                     |
|                    | Vitexin(mg/g)                          | VITE               | Quantitative | 1    | 1        | 1      | 2.52    | 0.66    | 1.44    | 5.84     | 1.26     | 6.34     | --                       |
|                    | Isovitexin(mg/g)                       | ISOVITE            | Quantitative | 1    | 1        | 1      | 3.24    | 0.85    | 1.84    | 6.61     | 1.00     | 4.70     | --                       |
| Resistance         | Bruchid resistance                     | BR                 | Discrete     | 1    | 1        | 1      | 0.04    | 0.19    | 0.00    | 1.00     | 4.92     | 25.16    | --                       |
|                    | Resistance to fusarium wilt            | RFW                | Discrete     | 1    | 1        | 1      | 4.19    | 2.77    | 1.00    | 9.00     | 0.28     | 1.74     | --                       |
| Color              | Bud color                              | BDC                | Discrete     | 1    | 1        | 1      | 1.85    | 0.36    | 1.00    | 2.00     | -1.94    | 4.78     | --                       |
|                    | Flower color                           | FLC                | Discrete     | 1    | 1        | 1      | 2.77    | 0.57    | 1.00    | 3.00     | -2.39    | 7.26     | --                       |
|                    | Pod color                              | PDC                | Discrete     | 1    | 1        | 1      | 0.03    | 0.18    | 0.00    | 1.00     | 5.29     | 29.03    | --                       |
|                    | Petiole color                          | PLC                | Discrete     | 1    | 1        | 1      | 1.81    | 0.39    | 1.00    | 2.00     | -1.56    | 3.45     | --                       |
|                    | Seed color                             | SDC                | Discrete     | 1    | 1        | 1      | 0.27    | 0.85    | 0.00    | 4.00     | 3.50     | 14.40    | --                       |
|                    | Trilobata leaf color                   | TLC                | Discrete     | 1    | 1        | 1      | 2.09    | 0.31    | 1.00    | 3.00     | 2.30     | 8.46     | --                       |
| Plant architecture | Young stem color                       | YSC                | Discrete     | 1    | 1        | 1      | 0.82    | 0.39    | 0.00    | 1.00     | -1.66    | 3.76     | --                       |
|                    | Plant height(cm)                       | PLH                | Quantitative | 2    | 2        | 2      | 69.91   | 30.15   | 24.40   | 172.27   | 1.42     | 4.76     | 0.76                     |
|                    | Growth habit                           | GRH                | Discrete     | 2    | 2        | 1      | 1.45    | 0.59    | 1.00    | 3.00     | 0.91     | 2.84     | 0.65                     |
|                    | Hypocotyl plus epicotyl length(mm)     | HECL               | Quantitative | 2    | 2        | 2      | 38.98   | 22.72   | 1.23    | 83.53    | -0.28    | 1.86     | 0.44                     |
|                    | Maximum leaflet area(mm <sup>2</sup> ) | MLA                | Quantitative | 2    | 2        | 2      | 8594.00 | 2289.06 | 3188.12 | 16288.01 | 0.43     | 2.87     | 0.86                     |
|                    | Maximum leaflet length(mm)             | MLL                | Quantitative | 2    | 2        | 2      | 124.76  | 18.46   | 78.53   | 171.04   | 0.13     | 2.49     | 0.84                     |
|                    | Maximum leaflet width(mm)              | MLW                | Quantitative | 2    | 2        | 2      | 105.93  | 16.19   | 62.32   | 153.92   | 0.12     | 2.56     | 0.94                     |
|                    | Main stem diameter(mm)                 | MSD                | Quantitative | 2    | 1        | 2      | 9.15    | 1.72    | 5.46    | 14.60    | 0.70     | 3.00     | 0.58                     |
|                    | Node number of main stem               | MSNN               | Quantitative | 2    | 2        | 2      | 11.51   | 1.57    | 7.33    | 17.60    | 0.54     | 3.66     | 0.86                     |
|                    | Pod shape                              | PDS                | Discrete     | 1    | 1        | 1      | 1.28    | 0.45    | 1.00    | 2.00     | 0.98     | 1.95     | --                       |
|                    | Trilobata leaf shape                   | TLS                | Discrete     | 1    | 1        | 1      | 2.65    | 1.23    | 1.00    | 9.00     | 0.65     | 5.65     | --                       |
| Other              | Days to first flower(d)                | FLD                | Quantitative | 2    | 2        | 2      | 45.01   | 6.12    | 27.67   | 60.33    | -0.20    | 2.78     | 0.65                     |
|                    | Seed capsule                           | SDCG               | Discrete     | 1    | 1        | 1      | 0.40    | 0.49    | 0.00    | 1.00     | 0.40     | 1.16     | --                       |
|                    | Pod Shattering                         | POS                | Discrete     | 1    | 1        | 1      | 1.37    | 0.92    | 1.00    | 4.00     | 2.28     | 6.53     | --                       |

**Table S9 Summary of SNP-trait association sites (STAs) in different environment.**

| Trait   | 2017SJZ |        | 2018SJZ |        | 2017ZJK | 2018ZJK | Total STAs | Consistent(more than 1 year or season) | Stable(more than one location) | Robust (>15% PVE) |
|---------|---------|--------|---------|--------|---------|---------|------------|----------------------------------------|--------------------------------|-------------------|
|         | Spring  | Summer | Spring  | Summer | Spring  | Spring  |            |                                        |                                |                   |
| BRN     | 14      | 14     | 4       | 994    |         |         | 1013       | 13                                     |                                | 690               |
| PDL     | 6       | 4      | 12      | 18     | 7       |         | 43         | 4                                      |                                | 14                |
| PDTN    | 1       | 1      | 1       | 2      | 1       | 3       | 9          |                                        |                                | 1                 |
| PDW     | 5       | 5      | 3       | 17     | 134     | 2       | 158        | 4                                      | 4                              | 113               |
| SD100WT | 10      | 4      | 11      | 1      | 4       | 1       | 26         | 5                                      |                                | 15                |
| SDNPPD  | 4       |        | 1       | 1      | 54      |         | 60         |                                        |                                | 40                |
| YPPL    | 4       | 4      | 161     |        | 5       | 7       | 169        | 8                                      | 4                              | 113               |
| CPC     |         |        |         | 9      |         |         | 9          |                                        |                                |                   |
| CSC     |         |        |         | 71     |         | 89      | 138        |                                        | 22                             | 29                |
| VITE    |         |        |         | 3      |         |         | 3          |                                        |                                |                   |
| ISOVITE |         |        |         | 136    |         |         | 136        |                                        |                                | 1                 |
| BR      |         | 600    |         |        |         |         | 600        |                                        |                                | 546               |
| RFW     |         |        |         | 10     |         |         | 10         |                                        |                                |                   |
| BDC     |         |        |         |        |         | 16      | 16         |                                        |                                | 15                |
| FLC     |         |        |         |        |         | 27      | 27         |                                        |                                | 15                |
| PDC     |         | 148    |         |        |         |         | 148        |                                        |                                | 83                |
| PLC     |         |        |         |        |         | 36      | 36         |                                        |                                | 8                 |
| SDC     |         | 194    |         |        |         |         | 194        |                                        |                                | 92                |
| TLC     |         |        |         |        |         | 21      | 21         |                                        |                                | 6                 |
| YSC     |         | 31     |         |        |         |         | 31         |                                        |                                | 24                |
| PLH     | 7       | 7      |         | 1      | 2       | 3       | 19         | 1                                      |                                | 5                 |
| GRH     |         | 181    |         |        |         |         | 181        |                                        |                                | 18                |
| HECL    | 4       | 43     | 5       | 9      | 19      | 206     | 264        | 22                                     |                                | 195               |
| MLA     | 11      | 1      |         |        | 17      | 4       | 30         | 3                                      |                                | 2                 |
| MLL     |         | 6      |         |        | 236     |         | 242        |                                        |                                | 176               |
| MLW     | 4       | 1      |         |        | 17      | 2       | 21         | 3                                      |                                | 3                 |
| MSD     | 231     | 1      |         |        |         |         | 232        |                                        |                                | 15                |
| MSNN    | 9       | 6      |         |        | 3       | 3       | 21         |                                        |                                | 1                 |
| PDS     |         |        |         |        |         | 8       | 8          |                                        |                                |                   |
| TLS     |         |        |         |        |         |         |            |                                        |                                |                   |
| FLD     | 89      | 1      | 1       | 10     | 7       | 14      | 119        | 3                                      | 1                              | 23                |
| SDCG    |         | 4      |         |        |         |         | 4          |                                        |                                | 2                 |
| POS     |         |        |         |        |         | 18      | 18         |                                        |                                | 15                |

**Table S10 Summary of gene PAV-trait association (GPTA) in different environment.**

| Trait   | 2017SJZ |        | 2018SJZ |        | 2017ZJK | 2018ZJK | Total | Consistent(more than 1 year or season) | Stable(more than one location) | Robust (>15% PVE) |
|---------|---------|--------|---------|--------|---------|---------|-------|----------------------------------------|--------------------------------|-------------------|
|         | Spring  | Summer | Spring  | Summer | Spring  | Spring  |       |                                        |                                |                   |
| BRN     | 7       | 5      |         | 6      |         |         | 13    | 5                                      |                                | 7                 |
| PDL     | 5       |        | 1       | 1      | 3       |         | 10    |                                        |                                |                   |
| PDTN    |         | 2      |         |        |         |         | 2     |                                        |                                | 1                 |
| PDW     |         | 8      |         | 2      |         |         | 10    |                                        |                                |                   |
| SD100WT | 2       |        |         |        | 1       |         | 3     |                                        |                                |                   |
| SDNPPD  |         | 1      |         |        | 1       |         | 2     |                                        |                                |                   |
| YPPL    |         |        | 1       |        |         |         | 1     |                                        |                                |                   |
| CPC     |         |        |         |        |         | 1       | 1     |                                        |                                |                   |
| CSC     |         |        |         | 6      |         | 3       | 9     |                                        |                                |                   |
| VITE    |         |        |         |        |         |         |       |                                        |                                |                   |
| ISOVITE |         |        |         |        |         |         |       |                                        |                                |                   |
| BR      |         | 144    |         |        |         |         | 144   |                                        |                                | 132               |
| RFW     |         |        |         |        |         |         |       |                                        |                                |                   |
| BDC     |         |        |         |        |         | 12      | 12    |                                        |                                | 12                |
| FLC     |         |        |         |        |         | 15      | 15    |                                        |                                | 12                |
| PDC     |         | 8      |         |        |         |         | 8     |                                        |                                | 1                 |
| PLC     |         |        |         |        |         | 12      | 12    |                                        |                                | 12                |
| SDC     |         | 9      |         |        |         |         | 9     |                                        |                                | 1                 |
| TLC     |         |        |         |        |         | 6       | 6     |                                        |                                |                   |
| YSC     |         | 12     |         |        |         |         | 12    |                                        |                                | 12                |
| PLH     | 11      | 1      |         |        |         |         | 12    |                                        |                                |                   |
| GRH     |         | 10     |         |        |         | 1       | 11    |                                        |                                | 2                 |
| HECL    |         | 10     |         |        |         | 1       | 11    |                                        |                                |                   |
| MLA     | 1       | 2      |         |        |         |         | 2     | 1                                      |                                |                   |
| MLL     | 1       | 1      |         |        |         |         | 2     |                                        |                                |                   |
| MLW     |         | 3      |         |        | 1       |         | 4     |                                        |                                |                   |
| MSD     | 19      |        |         |        |         |         | 19    |                                        |                                | 5                 |
| MSNN    | 7       | 5      |         |        |         |         | 12    |                                        |                                |                   |
| PDS     |         |        |         |        |         | 1       | 1     |                                        |                                |                   |
| TLS     |         |        |         |        |         | 2       | 2     |                                        |                                |                   |
| FLD     | 2       |        | 1       | 25     | 4       | 1       | 33    |                                        |                                | 10                |
| SDCG    |         |        |         |        |         |         |       |                                        |                                |                   |
| POS     |         |        |         |        |         | 7       | 7     |                                        |                                |                   |
